1 **Title**

2 Structure-function analysis of *Arabidopsis* TOPLESS reveals conservation of repression  
3 mechanisms across eukaryotes

4

5 **Authors**

6 Alexander R. Leydon<sup>1</sup>, Wei Wang<sup>2,†</sup>, Samuel Juarez-Solis<sup>1</sup>, Joseph E. Zemke<sup>1</sup>, Mollye  
7 L. Zahler<sup>1</sup>, Ning Zheng<sup>2,3</sup>, Jennifer L. Nemhauser<sup>1</sup>

8

9 <sup>1</sup>Department of Biology, University of Washington

10 <sup>2</sup>Department of Pharmacology & <sup>3</sup>Howard Hughes Medical Institute, University of  
11 Washington

12 <sup>†</sup>Present address: Key Laboratory of Plant Stress Biology, State Key Laboratory of  
13 Cotton Biology, School of Life Science, Jinming Campus, Henan University, Kaifeng,  
14 Henan Province, 475004, PR of China.

15 **Abstract**

16 The corepressor TOPLESS (TPL) is recruited to many promoters, yet the mechanisms  
17 by which it inhibits expression of genes is poorly understood. Using a synthetic auxin  
18 response circuit in *Saccharomyces cerevisiae*, we identified two regions of *Arabidopsis*  
19 *thaliana* TPL that could independently function as repression domains: the LIS1  
20 homology domain (LisH) and the CT11-RanBPM (CRA) domain. The CRA repressor  
21 domain required direct interaction with the Mediator subunit MED21 for full function.  
22 While corepressor multimerization is highly conserved, we found that multimer formation  
23 had minimal influence on TPL repression strength in yeast or in plants. Finally, we  
24 showed that the LisH domain may have a conserved role in repression in different  
25 proteins, as a LisH domain from the human TBL1 protein could replace TPL in synthetic  
26 assays. Our work provides insight into the molecular mechanisms of transcriptional  
27 repression, while also characterizing short, autonomous repression domains to augment  
28 synthetic biology toolkits.

29

## 30 Introduction

31 Control over gene expression is essential for life. This is especially evident during  
32 development when the switching of genes between active and repressed states drives  
33 fate determination. Mutations that interfere with repression lead to or exacerbate  
34 numerous cancers (Wong et al., 2014) and cause developmental defects in diverse  
35 organisms (Grbavec et al., 1998; Long et al., 2006), yet many questions remain about  
36 how cells induce, maintain, and relieve transcriptional repression. Transcriptional  
37 repression is controlled in part by a class of proteins known as corepressors that  
38 interact with DNA-binding transcription factors and actively recruit repressive machinery.  
39 Transcriptional corepressors are found in all eukaryotes and include the animal SMRT  
40 (silencing mediator of retinoic acid and thyroid hormone receptor) and NCoR (Nuclear  
41 receptor corepressor) complexes (Mottis et al., 2013; Oberoi et al., 2011), the yeast  
42 Tup1 (Matsumura et al., 2012), and its homologs *Drosophila* Groucho (Gro) and  
43 mammalian transducing-like enhancer (TLE) (Agarwal et al., 2015).

44 In plants, TOPLESS (TPL) and TOPLESS-RELATED (TPR1-4), LEUNIG (LUG)  
45 and its homolog (LUH), High Expression of Osmotically responsive genes 15 (HOS15)  
46 all act as Gro/TLE-type corepressors (Causier et al., 2012; Lee and Golz, 2012; Liu and  
47 Karmarkar, 2008; Long et al., 2006; Zhu et al., 2008). Defects in the TPL family have  
48 been linked to aberrant stem cell homeostasis (Busch et al., 2010), organ development  
49 (Gonzalez et al., 2015), and hormone signaling (Causier et al., 2012; Kagale et al.,  
50 2010), especially the plant hormone auxin (Long et al., 2006). Plant Gro/TLE-type  
51 corepressors share a general structure, where at the N-terminus a LIS1 homology  
52 (LisH) domain contributes to protein dimerization (Delto et al., 2015; Kim et al., 2004).  
53 At the C-terminus, WD40 repeats form beta-propeller structures involved in protein-  
54 protein interactions (Collins et al., 2019; Liu et al., 2019). In TPL family repressors, the  
55 LisH is followed by a C-terminal to LisH domain (CTLH) that binds transcriptional  
56 repressors through an Ethylene-responsive element binding factor-associated  
57 Amphiphilic Repression (EAR) motif (Causier et al., 2012; Kagale et al., 2010). The N-  
58 terminal domain also contains a CT11-RanBPM (CRA) domain, which provides a  
59 second TPL dimerization interface and stabilizes the LisH domain (Ke et al., 2015;  
60 Martin-Arevalillo et al., 2017). While the beta-propellers have been speculated to control  
61 protein interaction with other repressive machinery, they are known to bind the non-EAR  
62 TPL recruitment motifs found in transcriptional regulators (RLFGV- and DLN-type  
63 motifs, (Liu et al., 2019)).

64 We have previously demonstrated the recapitulation of the auxin response  
65 pathway by porting individual components of the *Arabidopsis* auxin nuclear response in  
66 yeast (Pierre-Jerome et al., 2014). In this Auxin Response Circuit (*AtARC<sup>Sc</sup>*), an auxin  
67 responsive transcription factor called ARF binds to a promoter driving a fluorescent  
68 reporter. In the absence of auxin, the ARF protein activity is repressed by interaction  
69 with a full-length Aux/IAA protein fused to the N-terminal domain of TPL. Upon the

70 addition of auxin, the TPL-IAA fusion protein is targeted for degradation through  
71 interaction with a member of the Auxin Signaling F-box protein family (TIR1 or AFB2).  
72 Reporter activation can be quantified after auxin addition by microscopy and flow  
73 cytometry (Pierre-Jerome et al., 2014). In the original build and characterization of  
74 *AtARC*<sup>Sc</sup>, it was noted that the two N-terminal truncations of TPL (N100 or N300)  
75 behave differently (Pierre-Jerome et al., 2014). While both truncations are able to  
76 repress the function of a transcriptional activator fused to an Aux/IAA, only the TPLN100  
77 fusion shows alleviation of repression after auxin addition. TPLN300 fusions to  
78 Aux/IAAs maintain strong durable repression even in high concentrations of auxin. This  
79 disparity is not due to differential rates of protein degradation, as both proteins appear  
80 to be turned over with equal efficiency after auxin addition (Pierre-Jerome et al., 2014).

81 The crystal structure of the N-terminal domains of TPL homolog OsTPR2 from  
82 rice (Ke et al., 2015) and the *Arabidopsis* TPL (Martin-Arevalillo et al., 2017) have  
83 recently been solved. These structures reveal high conservation of protein folds in the  
84 N-terminus, as well as the residues that coordinate formation of homotetramers (Figure  
85 1A). Several lines of evidence suggest that the multimeric TPL modulates repression  
86 potential. First, the first isolated and dominant TPL mutant *tpl-1* altered a single amino  
87 acid in the ninth helix of the TPL-N terminus (N176H) that induces aggregation of TPL  
88 and its homologs, reducing total activity (Long et al., 2006; Ma et al., 2017). Second,  
89 TPL recruitment motifs found in the rice strigolactone signaling repressor D53 induce  
90 higher order oligomerization of the TPL N-terminus, which increases histone binding  
91 and transcriptional repression (Ma et al., 2017). Third, structural studies of *Arabidopsis*  
92 TPL demonstrated interdependency of the TPL tetramer formation and Aux/IAA binding  
93 (Martin-Arevalillo et al., 2017). One contrary piece of evidence is the strong repressive  
94 activity of the TPL N100 construct which lacks the majority of the CRA domain ((Martin-  
95 Arevalillo et al., 2017), Figure 1A) and is therefore unlikely to be able to form tetramers.

96 The conservation of TPL's repressive function in yeast suggests that the protein  
97 partners that enact the repression are also likely to be conserved across eukaryotes.  
98 Consistent with this speculation, the series of alpha-helices that form the N-terminal  
99 portion of TPL is highly reminiscent of naturally occurring truncated forms of mammalian  
100 TLE (Gasperowicz and Otto, 2005), such as Amino-terminal Enhancer of Split (AES)  
101 (Zhang et al., 2010), the Groucho ortholog LSY-22 (Flowers et al., 2010), and the  
102 unrelated mouse repressor protein MXI1 (Schreiber-Agus et al., 1995). Gro/TLE family  
103 members are generally considered to repress by recruiting histone deacetylases to  
104 control chromatin compaction and availability for transcription (Chen and Courey, 2000;  
105 Long et al., 2006). An alternative hypothesis has been described for Tup1 in yeast,  
106 where Tup1 blocks the recruitment of Polymerase II (Pol-II) (Wong and Struhl, 2011),  
107 possibly through contacts with Mediator complex subunits MED21 or MED3 (Gromöller  
108 and Lehming, 2000; Papamichos-Chronakis et al., 2000). However, like many of these  
109 family members, multiple repression mechanisms have been described for TPL at

110 different genetic loci. For example, TPL has been found to recruit the repressive CDK8  
111 Mediator complex (Ito et al., 2016), chromatin remodeling enzymes such as Histone  
112 Deacetylase 19 (HD19) (Long et al., 2006) and directly bind to histone proteins (Ma et  
113 al., 2017).

114 Here, we leveraged the power of yeast genetics to interrogate the mechanism of  
115 TPL repression. Using *AtARC<sup>Sc</sup>*, we have discovered that the N-terminal domain of TPL  
116 contains two unique repression domains that can act independently. We have mapped  
117 the first repression domain to the first 18 amino acids of the LisH domain (Helix 1), and  
118 the second domain to Helix 8 which falls within the CRA domain. We have also  
119 identified critical residues required for repression in each domain. In addition, we found  
120 that that multimerization of TPL is not required for repression in yeast or in plants. We  
121 have also determined that full repression by Helix 8 requires direct interaction with  
122 MED21, and that this interaction requires the same MED21 residues that control  
123 transcriptional activation of *Tup1*-regulated genes in yeast. Finally, we found that LisH  
124 domains are a rich potential source of short, modular, sequence-diverse repression  
125 domains for complex synthetic circuits. An example is a single helix from the LisH  
126 domain of the human TBL1 protein, which was able to recapitulate TPL function.

127

## 128 **Results**

129 To understand how TPL represses transcription, we first sought to localize repressive  
130 activity within the protein. In the *AtARC<sup>Sc</sup>*, the extent of auxin-induced turnover of  
131 TPLN100 and TPLN300 fusions appear similar, although neither are completely  
132 degraded (Pierre-Jerome et al., 2014). One interpretation is that auxin addition  
133 increases the sensitivity of the assay to detect subtle differences in the strength of  
134 repressive activity of each fusion protein by reducing its relative concentration—  
135 TPLN300 is a stronger repressor than TPLN100. To further exploit this synthetic  
136 repression assay, we began by generating a deletion series of the N-terminus guided by  
137 the available structural information (Ke et al., 2015; Martin-Arevalillo et al., 2017). We  
138 started with a TPLN188-IAA3 fusion protein construct, which behaves identically to  
139 TPLN300 (Pierre-Jerome et al., 2014), and subsequently deleted each alpha helical  
140 domain starting with Helix 9 (constructs are named in the format Helix x – Helix y or Hx-  
141 Hy). We found that Helix 8 was required for the maximum level of repression activity  
142 and for the maintenance of repression after auxin addition (Figure 1C). All constructs  
143 lacking Helix 8 retained the ability to repress transcription, but this repression was lifted  
144 in the presence of auxin (Figure 1C) as had been observed for the original TPLN100  
145 construct (Pierre-Jerome et al., 2014). Further deletions revealed that including only the  
146 18 amino acids of Helix 1 was sufficient to confer repression (H1, Figure 1D). To test  
147 whether Helix 8 activity depended on Helix 1, we tested an additional construct  
148 consisting solely of Helix 3 through Helix 9 (H3-H9, Figure 1D). This construct was also  
149 able to repress ARF activity, thus demonstrating that both Helix 1 (LisH) and Helix 8

150 (CRA) can act independently of one another (Figure 1D). To identify the minimal domain  
151 needed for Helix 8-based repression, we generated new deletions (Figure 1B,E-F).  
152 Helix 8 and the following linker were not sufficient for repression (Figure 1E), and  
153 removal of Helix 9 or of the linker between H8 and H9 slightly increased sensitivity to  
154 auxin (H1-H8 $\Delta$ 8L, Figure 1F). A deletion that removed both the LisH and Helix 8  
155 repression domains (H3-H7) was only able to weakly repress reporter expression  
156 (Figure 1F). Together, these results demonstrate that Helix 1 and Helix 8 could act as  
157 repression domains, and that the linker between Helix 8 and Helix 9 (which folds over  
158 Helix 1) was required for repression following addition of auxin. Helix 1 alone in the LisH  
159 domain was sufficient to act on its own as a modular repression domain. The repressive  
160 activity of Helix 8 was only functional in the context of the larger Helix 3-Helix 8  
161 truncation that carries the CTLH domain and a portion of the CRA domain.

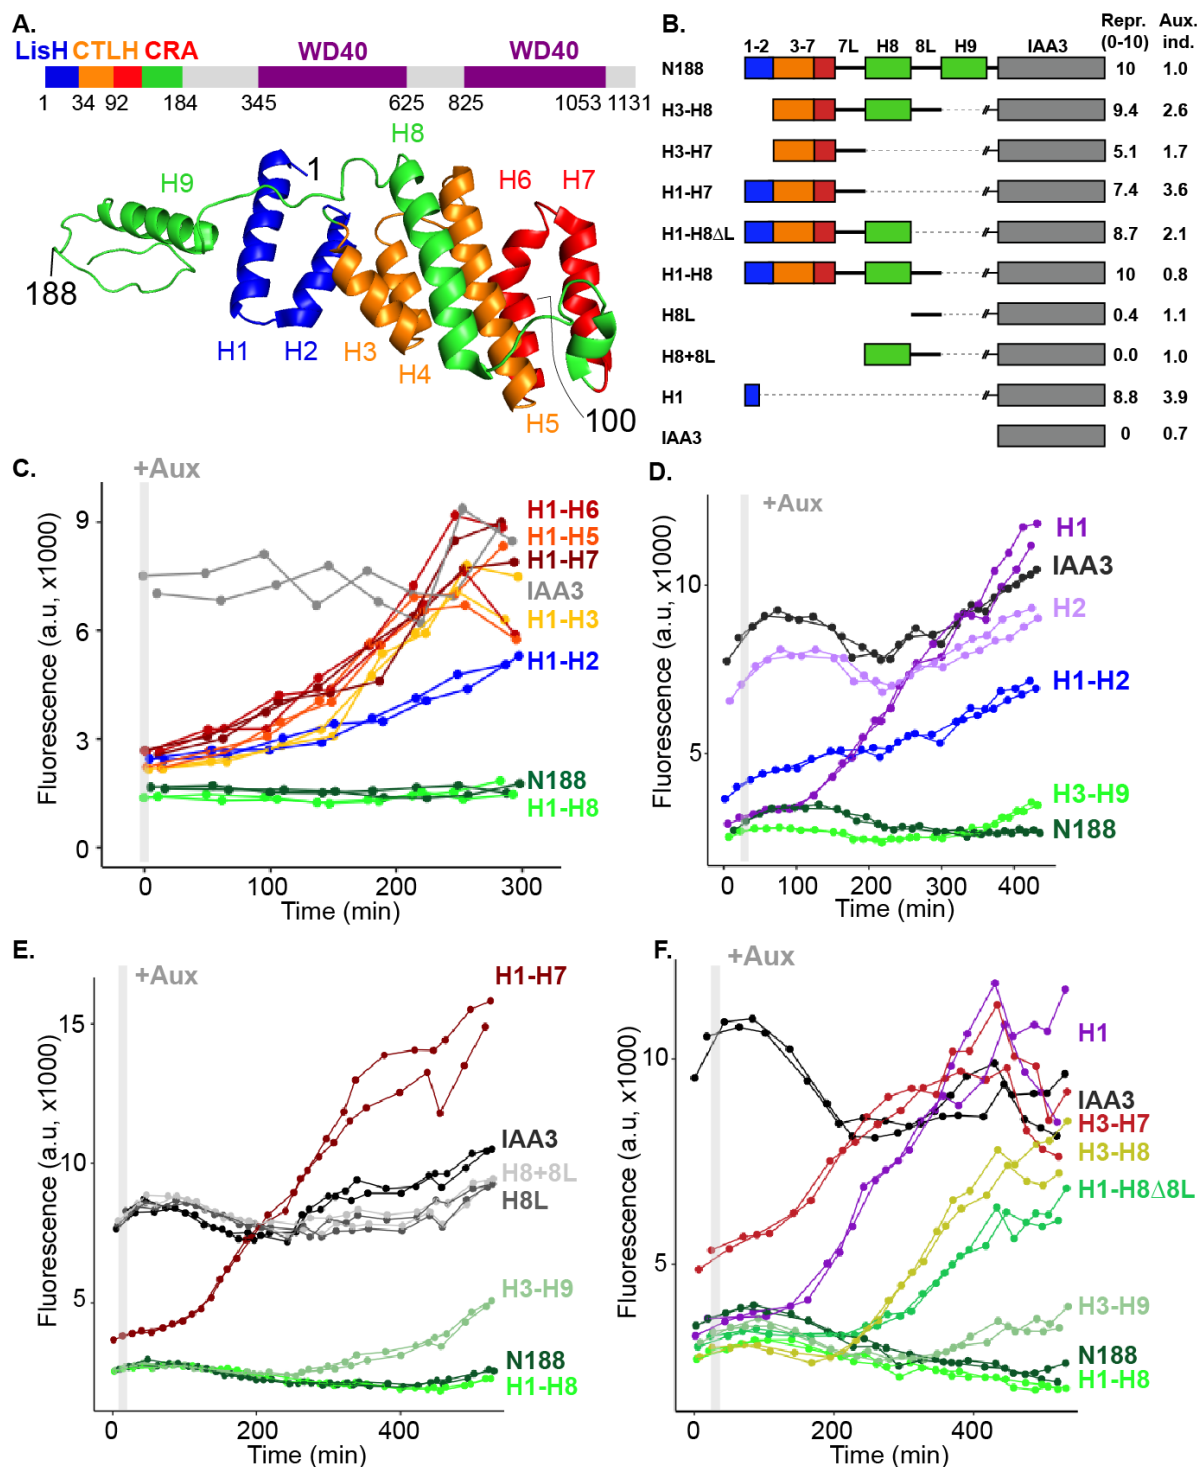

162  
163  
164  
165  
166  
167  
168

**Figure 1. The N-terminal domain of TPL contains two independent repression domains.** **A.** TPL domains are LisH (LIS1 homology motif, blue), CTLH (C-terminal LisH motif, orange), CRA (CT11-RanBPM, red - dimerization and green - foldback), and two WD40, beta-propeller motifs (purple). N-terminal domains are indicated on the solved structure of the first 202 amino acids ((Martin-Arevalillo et al., 2017), 5NQS). The termini of the TPL-N100 truncation used in the original ARC<sup>Sc</sup> studies is indicated. **B.**

169 Diagram indicating the structure of constructs analyzed in experiments shown in  
170 subsequent panels. Repression Index (Rep.) is a scaled measure of repression strength  
171 with 0 set to the level of repression observed with IAA3 and 10 set to the level of  
172 repression by TPLN188-IAA3. Auxin induction level (Aux.) indicates the fold change  
173 difference between reporter expression before auxin addition (time zero) and at the end  
174 of an experiment (~500 minutes) **C-F**. Helix 1 and the CRA domain (Helix 3-Helix 8) can  
175 act independently to repress transcription. Each panel represents two independent time  
176 course flow cytometry experiments of the TPL helices indicated, all fused to IAA3. Every  
177 point represents the average fluorescence of 5-10,000 individually measured yeast cells  
178 (a.u. - arbitrary units). Auxin (IAA-10 $\mu$ M) was added at the indicated time (gray bar, +  
179 Aux).

180  
181 To pinpoint which residues of Helix 1 and Helix 8 could coordinate repression  
182 through interaction with other transcriptional regulators, we identified likely solution-  
183 facing amino acids from each helix. We hypothesized that these amino acids were not  
184 involved in stabilizing the hydrophobic interactions between intra-TPL helical domains  
185 and could interact with partner proteins (Martin-Arevalillo et al., 2017). Six amino acids  
186 in Helix 1 and eight amino acids in Helix 8 were each mutated to alanine (Figure 2A,D,  
187 red residues) in the context of either H1-IAA3 or H3-H8-IAA3, respectively. Repression  
188 activity was assessed in the absence (Figure 2B,E) or presence (Figure 2C,F) of auxin.  
189 For Helix 1, the amino acids on either end of the helix (R6 and E18) were absolutely  
190 required for repression (Figure 2B). A mutation of E7, the immediate neighbor of R6,  
191 slightly increased reporter expression in the absence of auxin (Figure 2B) and lowered  
192 the final activation level after auxin addition when compared with wild type Helix 1  
193 (Figure 2C). The R6A, E7A double mutation behaved similarly to the R6A single  
194 mutation. Likewise, the D17A, E18A double mutation did not enhance the effect of E18A  
195 alone. Q14 and D17 were indistinguishable from wild type Helix 1 (Figure 2C). In  
196 contrast to the other mutations which reduced Helix 1 repression activity or had no  
197 effect, F10A strengthened the durability of repression Helix 1, converting it into an  
198 auxin-insensitive Helix 8-type of repression domain (Figure 2C). In the context of the  
199 full-length N-terminus of TPL, F10 sits underneath the linker that connects Helix 8 to  
200 Helix 9, interacting with inward-facing hydrophobic cluster formed by F10 and F163,  
201 F33, F34 and L165 (Figure 2 – Figure Supplement 1A,B). It is likely that in any  
202 truncations where the linker is removed (i.e., H1-H2 through H1-H7 in Figure 1, and  
203 N100), F10 negatively affects repressor activity, possibly by decreasing binding affinity  
204 to putative interaction partners or the stability of protein complexes.

205 Unlike Helix 1, Helix 8 has an entirely solvent-exposed face, with eight amino  
206 acids that could be involved in protein-protein interactions. No single amino acid was  
207 essential for repression (Figure 2E). Two mutations (R140A and K148A) slightly  
208 increased baseline expression of the reporter (Figure 2D-F). All mutations, except



209 V145A and E152A that behaved as controls (data not shown), altered the stability of  
210 repression after auxin addition, either by increasing (S138A, E146A, K149A) or  
211 decreasing (I142A) the final fluorescence level (Figure 2F). Mutating E146 and K149  
212 also increased the speed with which the reporter responded to auxin (Figure 2F),  
213 suggesting that these two neighboring residues could be a critical point of contact with  
214 co-repressive machinery. S138A had a small increase in auxin sensitivity, while I142  
215 reduced auxin sensitivity (Figure 2F). TPL/TPR corepressors are recruited to  
216 transcription factors through an Ethylene-responsive element binding factor-associated  
217 Amphiphilic Repression (EAR) motif (Causier et al., 2012; Kagale et al., 2010), which  
218 binds to the TPL in a pocket adjacent to Helix 8 (Ke et al., 2015; Martin-Arevalillo et al.,  
219 2017). While these two residues (S138A, I142) do not contact the conserved leucine  
220 residues of the EAR motif (LxLxL), in the AtTPL structure the C-terminal portion of the  
221 IAA27 EAR domain makes contact with these residues (Martin-Arevalillo et al., 2017).  
222 As we are using a TPL-IAA fusion protein, repression does not depend on EAR-TPL  
223 interaction, therefore making it difficult to fully assess any role this interaction normally  
224 plays in recruiting repression machinery (Figure 2 - Figure Supplement 1C).

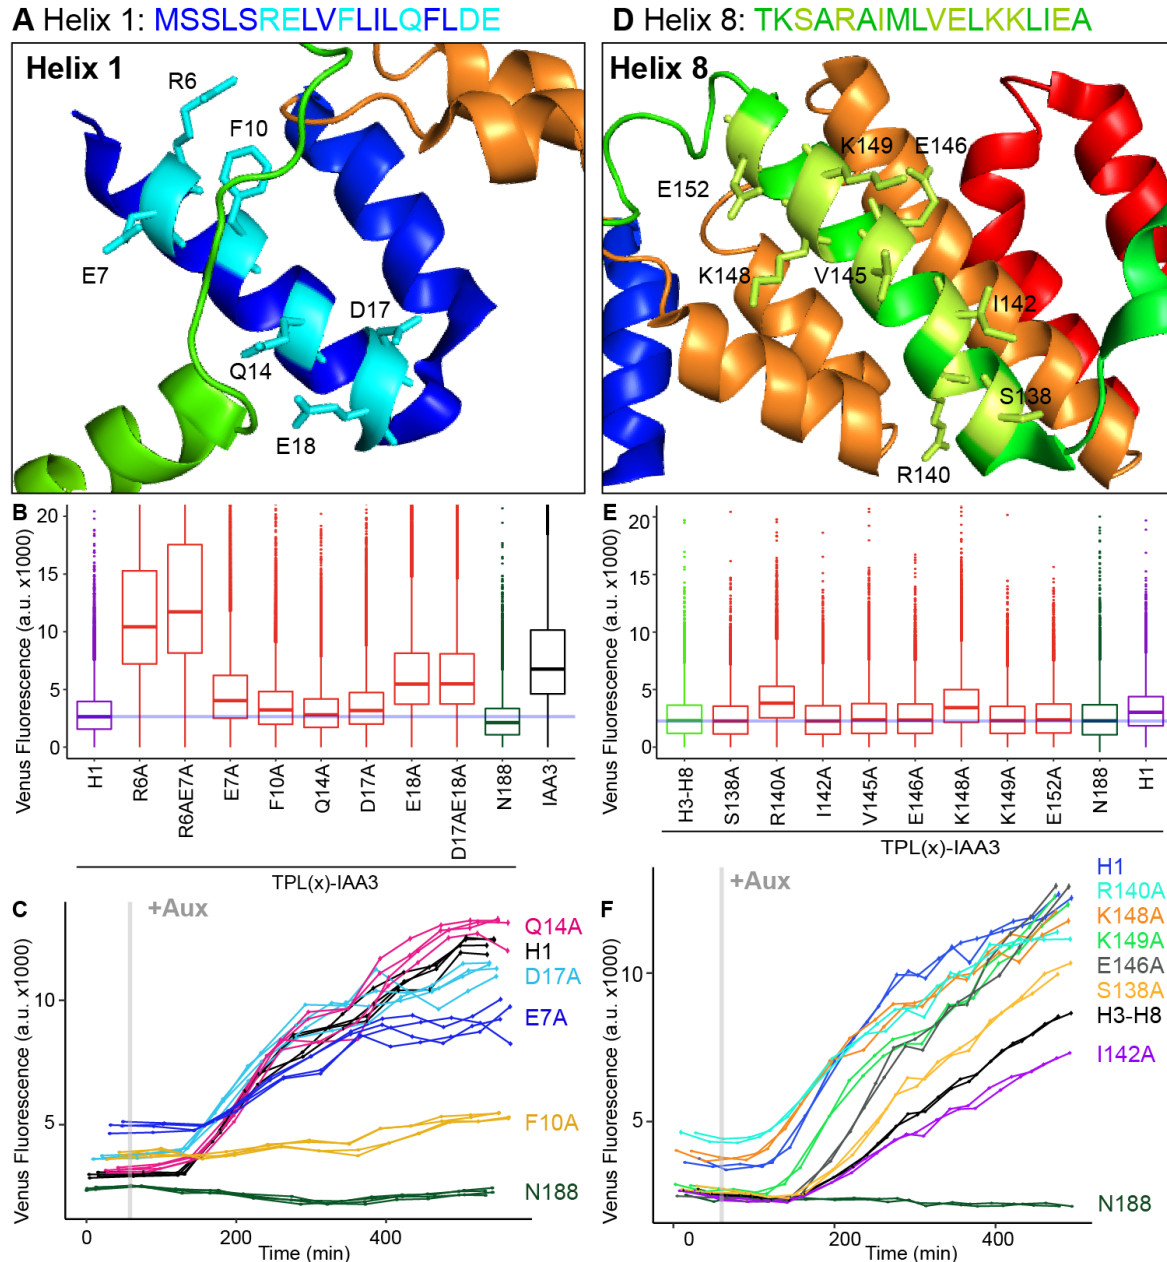

225

226

227

228

229

230

231

232

233

234

235

**Figure 2. Identification of critical residues within each repression domain. A.**

Sequence and structure of Helix 1 (5NQS). The LisH domain is colored blue, and amino

acids chosen for mutation are highlighted in both the sequence and the structure. B.

Repression activity of indicated single and double alanine mutations. C. Time course

flow cytometry of selected mutations of Helix 1 following auxin addition. D. Sequence

and structure of Helix 8 (5NQS). Helix 8 is colored green, and amino acids chosen for

mutation are highlighted in red in both the sequence and the structure. E. Repression

activity of indicated alanine mutations. F. Time course flow cytometry of selected

mutations of Helix 8 following auxin addition. For all cytometry experiments, the

indicated TPL construct is fused to IAA3. Every point represents the average

236 fluorescence of 5-10,000 individually measured yeast cells (a.u. - arbitrary units). Auxin  
237 (IAA-10 $\mu$ M) was added at the indicated time (gray bar, + Aux). At least two independent  
238 experiments are shown for each construct.

239

240 To determine which of the many known or predicted TPL-binding partners could  
241 mediate the repression activity of Helix1 and Helix8, we identified known interactors with  
242 either TPL or other Gro/TLE co-repressors, and then introduced the *Arabidopsis*  
243 homologs of these genes into the cytoSUS system. Putative direct interactors include  
244 histone deacetylases (HDACs - AtHDAC9, AtHDAC6, (Long et al., 2006)), Histone  
245 proteins (Histone H3, Histone H4, (Ma et al., 2017)), and the Mediator components  
246 MED13 (AtMED13, (Ito et al., 2016)) and MED21, which has been demonstrated to  
247 interact with Tup1, the yeast homolog of TPL (Gromöller and Lehming, 2000). We did  
248 not observe any interactions between TPL-N188 and the HDACs HDA6 and HDA9; the  
249 histone protein AtHIS4; or the Mediator subunit AtMED13 (Figure 3A, Figure 3 – Figure  
250 Supplement 1A). HDAC interaction with TPL has been previously hypothesized to occur  
251 through indirect interactions with partner proteins (Krogan et al., 2012), however direct  
252 interactions with histones and MED13 have been detected (Ito et al., 2016; Ma et al.,  
253 2017). The absence of interaction between TPL-N188 and these proteins may be due to  
254 differences between methods, or interaction interfaces in the C-terminal WD40 repeats.

255 Strong interaction was detected between TPL-N188 and AtMED21 (Figure 3A).  
256 MED21 is one of the most highly conserved Mediator subunits (Bourbon, 2008), and  
257 has a particularly highly conserved N-terminus (Figure 3 – Figure Supplement 1A,C-E).  
258 In yeast, Tup1 interacts with the first 31 amino acids of ScMed21, with the first seven  
259 amino acids being absolutely required (Gromöller and Lehming, 2000). We observed  
260 that the equivalent truncation of AtMED21 (AtMED21-N31) was sufficient for interaction  
261 with TPL-N188 (Figure 3A). We next created truncations of the N-terminal domain of  
262 AtMED21 to closely match those that had been made in yeast (Figure 3B, Figure 3 –  
263 Figure Supplement 1B) where deletion of the first five amino acids of ScMed21  
264 (Sc $\Delta$ 5Med21) severely reduce the ability of the Mediator complex to co-purify with Pol-II  
265 and CDK8 kinase complex (Sato et al., 2016). Interaction between TPLN188 and  
266 AtMED21 similarly required the first five amino acids of AtMED21 (Figure 3B), and this  
267 truncation did not significantly impact protein levels (Figure 3B).

268 We next tested which TPL repression domain interacted with AtMED21. We  
269 observed that AtMED21-N31 interacts with a construct containing Helix 8 (TPLH2-H9,  
270 Figure 3C), but not with a construct containing Helix 1 (TPLH1-H5, Figure 3 – Figure  
271 Supplement 3). We tested whether the residues in Helix 8 that were required for  
272 repression (V145, E146, K148, K149, Figure 2D-F) were also required for interaction  
273 with AtMED21. Single alanine mutations of these four amino acids in the context of  
274 TPLN188 significantly reduced interaction with AtMED21, while the quadruple mutation  
275 (here called Quad<sup>AAAA</sup>) completely abrogated AtMED21 binding (Figure 3D). When

276 tested in the *AtARC*<sup>Sc</sup>, TPLN188-Quad<sup>AAAA</sup> resembled the repressive activity of wild-  
 277 type N188 (red and black, Figure 3E), consistent with the observation that Helix 1 is  
 278 sufficient for repression (Figure 1D). When F10 is buried under the linker between Helix  
 279 8 and Helix 9 (Figure 1 – Figure Supplement 1), or mutated to alanine (Figure 2C), Helix  
 280 1 is capable of driving auxin insensitive repression. Introduction of Quad<sup>AAAA</sup> mutations  
 281 into the Helix 3 through Helix 8 context (H3-H8-Quad<sup>AAAA</sup>) largely phenocopied a Helix 3  
 282 through Helix 7 truncation (H3-H7, Figure 1F) with a drastically reduced repression  
 283 strength and rapid alleviation of repression by auxin addition (yellow and pink, Figure  
 284 4E). These results indicate that the CRA domain (H3-H8) requires contact with MED21  
 285 to drive repression, and that this is independent of the repression through Helix 1.  
 286

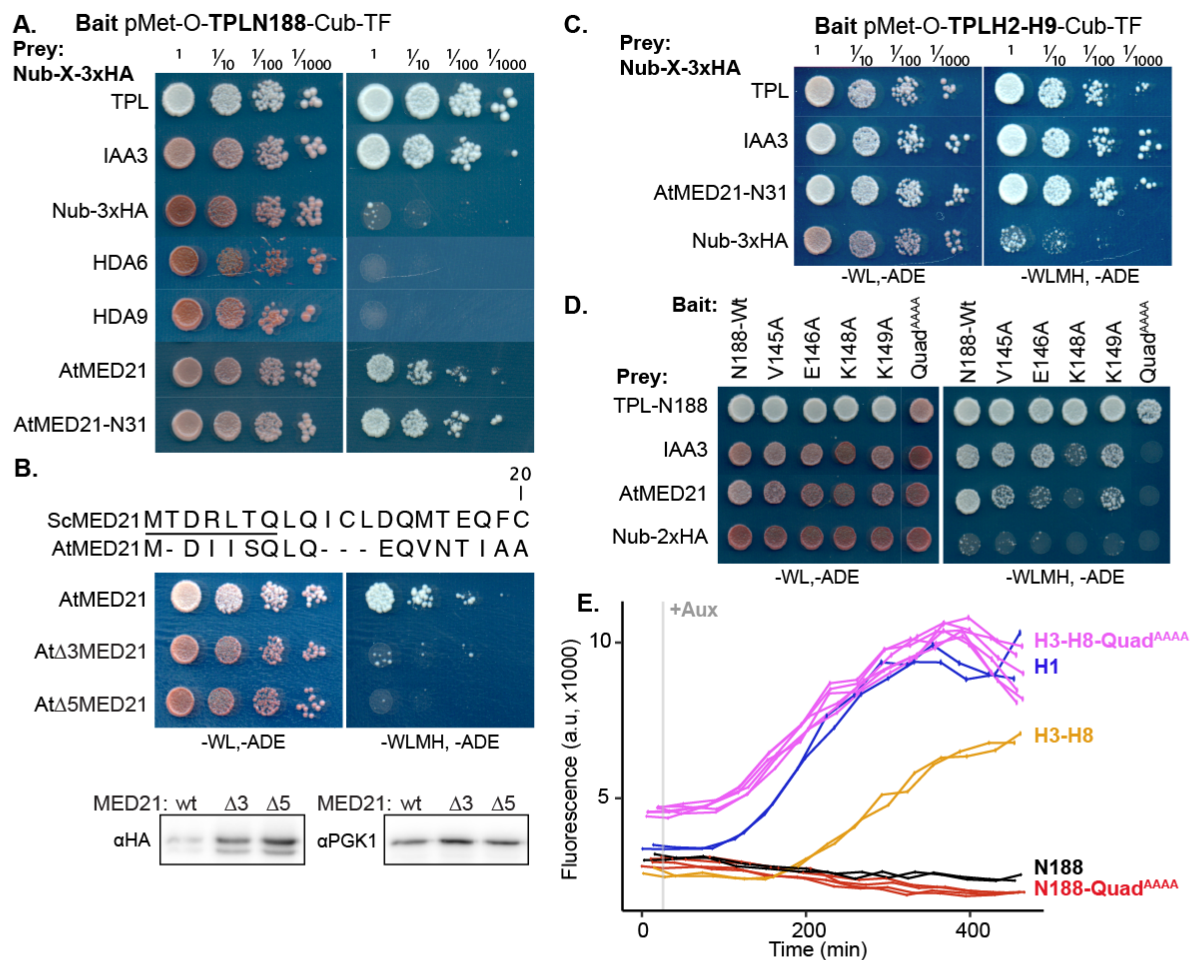

287  
 288 **Figure 3. The Helix 8 repression domain of TPL directly interacts with MED21. A.**  
 289 cytoSUS assays with candidate interacting proteins. **B.** Alignments of the *Arabidopsis*  
 290 (*At*) and *Saccharomyces* (*Sc*) MED21 proteins are shown above cytoSUS assays with  
 291 the same bait shown in **A**. Western blots below the colonies indicated that AtMED21 N-  
 292 terminal Δ3 and Δ5 are well expressed in assay conditions. **C.** A TPL-N truncation  
 293 lacking Helix 1 (TPLH2-H9) could still interact with the AtMED21-N31 truncation. This

294 bait construct interacted with TPL-N188 and IAA3, but only minimally with the negative  
295 control (free Nub-3xHA). **D.** A series of alanine mutations (V145A, E146A, K148A,  
296 K149A, and the quadruple mutant Quad<sup>AAAA</sup> chosen from Figure 2D-F) were introduced  
297 into the TPL-N188 bait construct and tested for interaction with wild-type TPL-N188,  
298 IAA3 and AtMED21. Each single alanine mutation reduces TPL interaction with  
299 AtMED21, while the quad mutation abrogated interaction. These mutations also  
300 reduced the binding strength of TPLN with IAA3, consistent with their position along the  
301 EAR binding pocket. **E.** The Helix 8 Quad<sup>AAAA</sup> mutation was introduced into the  
302 TPLN188-IAA3 and TPLH3-8-IAA3 fusion proteins and compared to wild type N188 in  
303 time course flow cytometry. For all cytometry experiments, the indicated TPL construct  
304 is fused to IAA3. Every point represents the average fluorescence of 5-10,000  
305 individually measured yeast cells (a.u. - arbitrary units). Auxin (IAA-10 $\mu$ M) was added at  
306 the indicated time (gray bar, + Aux). At least two independent experiments are shown  
307 for each construct.

308  
309 To determine whether a protein-protein interaction is required for corepressor  
310 function, it is critical to demonstrate that reciprocal loss of function mutations activate  
311 repressed genes. In the case of Tup1, a standard approach has been to test deletion  
312 mutations of Tup1-interacting proteins to determine whether their interaction represents  
313 a true repression modality on the target gene (Gromöller and Lehming, 2000; Lee et al.,  
314 2000; Zhang and Reese, 2004). Deletion of the first 7 amino acids of ScMed21  
315 ( $\Delta$ 7Med21) partially releases genes that are normally repressed by Tup1 into a  
316 transcriptionally active state (Gromöller and Lehming, 2000). We hypothesized that TPL  
317 repression would also be partially alleviated by such a deletion. Testing this hypothesis  
318 was complicated by the fact that ScMed21 is an essential gene, and yeast carrying  
319 deletions like  $\Delta$ 7Med21 grow more slowly (Gromöller and Lehming, 2000; Hallberg et  
320 al., 2006), which itself alters expression levels of reporters. In fact, even the  $\Delta$ 5Med21  
321 yeast mutant has been demonstrated to alter Mediator assembly as the first 5 amino  
322 acids of ScMed21 are required for binding of Pol II and the CDK8 kinase module to the  
323 Mediator core (Hallberg et al., 2006; Sato et al., 2016). Therefore, we turned to the  
324 Anchor Away system for rapid, chemically conditional protein depletion (Haruki et al.,  
325 2008) to remove ScMed21 from the nucleus of yeast containing the auxin response  
326 circuit (Figure 4A). Anchor Away utilizes chemically dependent protein dimerization in  
327 the presence of Rapamycin to anchor target proteins in the cytoplasm, effectively  
328 removing their activity from the nucleus.

329 *AtARC*<sup>Sc</sup> integrates components at four genomic locations using prototrophic  
330 markers that are not compatible with those needed for Anchor Away. To overcome this  
331 limitation, we re-created the entire ARC on a single plasmid (SLARC) using the  
332 Versatile Genetic Assembly System (VEGAS, (Mitchell et al., 2015)). SLARC behaved  
333 with similar dynamics to the original *AtARC*<sup>Sc</sup> on both solid and liquid growth conditions

334 (Figure 4 – Figure Supplement 1). As a first test of the Anchor Away system with  
335 SLARC, we fused Tup1 and its partner protein Cyc8 to two copies of the FKBP12-  
336 rapamycin-binding (FRB) domain of human mTOR (Haruki et al., 2008). Rapamycin  
337 treatment of strains targeting either of these proteins caused no release of repression,  
338 providing confirmation that the ARC acts orthogonally to the yeast corepressor (Figure 4  
339 – Figure Supplement 2).

340 We introduced SLARCs with different TPL constructs into strains where  
341 ScMed21 wild-type or N-terminal deletions were targets of Anchor Away. Strains  
342 expressing ScMed21 with or without FRB fusions behaved similarly (Figure 4B, Figure 4  
343 – Figure Supplement 3). We then compared the transcriptional output of the fully  
344 repressed SLARC<sup>N188</sup> in MED21 N-terminal mutants lacking the first 3, 5 or 7 amino  
345 acids. We observed that all three deletions significantly increased the expression of the  
346 reporter in SLARC<sup>N188</sup>, while no mutation increased the SLARC's sensitivity to auxin  
347 (Figure 4B, Figure 4 – Figure Supplement 3) as expected from the TPL truncation data  
348 (Figure 3E). As  $\Delta 7$ ScMed21 did not increase reporter expression when compared to  
349  $\Delta 5$ ScMed21 yet did have a noticeable impact on growth, we eliminated it from further  
350 analyses. Deletions of ScMed21 N-terminal residues impairs auxin responsive  
351 transcriptional activation in SLARC<sup>H1-H5</sup> (Figure 4C), consistent with the role of this  
352 region in promoting Pol-II recruitment (Sato et al., 2016). The fully repressed SLARC<sup>N188</sup>  
353 demonstrated no auxin sensitivity in  $\Delta 3$ ScMed21 or  $\Delta 5$ ScMed21 mutants, yet showed  
354 elevated transcription of the reporter (Figure 4D). Conversion of the first five amino  
355 acids of ScMed21 to the corresponding sequence from AtMED21 resulted in an  
356 identical repression profile (Figure 4 – Figure Supplement 4A), and had no effect on  
357 yeast growth or viability (Figure 4 – Figure Supplement 4B), further highlighting the  
358 conservation of this repression mechanism between the two organisms.

359 The stably expressed N-terminal deletions of ScMed21 likely alter the expression  
360 of multiple yeast genes, and this state change could confound our interpretations of the  
361 importance of ScMed21 on TPL repression. To minimize the off-target impact of  
362 ScMed21 deletions, we introduced estradiol inducible versions of ScMed21 (iScMed21)  
363 into the Anchor Away SLARC<sup>N188</sup> strains (Figure 4A, (McIsaac et al., 2013)). The  
364 combination of all three synthetic systems made it possible to rapidly deplete the wild  
365 type ScMed21-FRB from the nucleus while simultaneously inducing ScMed21 variants  
366 and visualizing the impact on a single auxin-regulated locus. Depletion of nuclear  
367 ScMED21 by Rapamycin increased levels of the reporter in all genotypes examined  
368 (Figure 4D) while also increasing cell size even in short time-courses, consistent with its  
369 essential role in many core pathways (Figure 4 – Figure Supplement 5A, (Gromöller and  
370 Lehming, 2000)). When wild-type iScMed21 was induced, there was a rescue of both  
371 phenotypes (Figure 5E, black), whereas induction of either  $\Delta 3$  and  $\Delta 5$  variants  
372 recapitulated the reporter activation seen in the stably expressed mutant versions  
373 (Figure 4E, green and blue, Figure 4 – Figure Supplement 5B). i $\Delta 3$ Med21 was induced

374 and accumulated at a comparable level to wild type MED21, while  $\Delta 5$  appears to be  
 375 less stable (Figure 4F). In these short time courses, we did not observe the cell size  
 376 increases observed in the Rapamycin treatments (populations were evenly distributed  
 377 around a single mean, suggesting we were observing the immediate effects of the  
 378 MED21 deletions (Figure 4 – Figure Supplement 5C-D)).  
 379

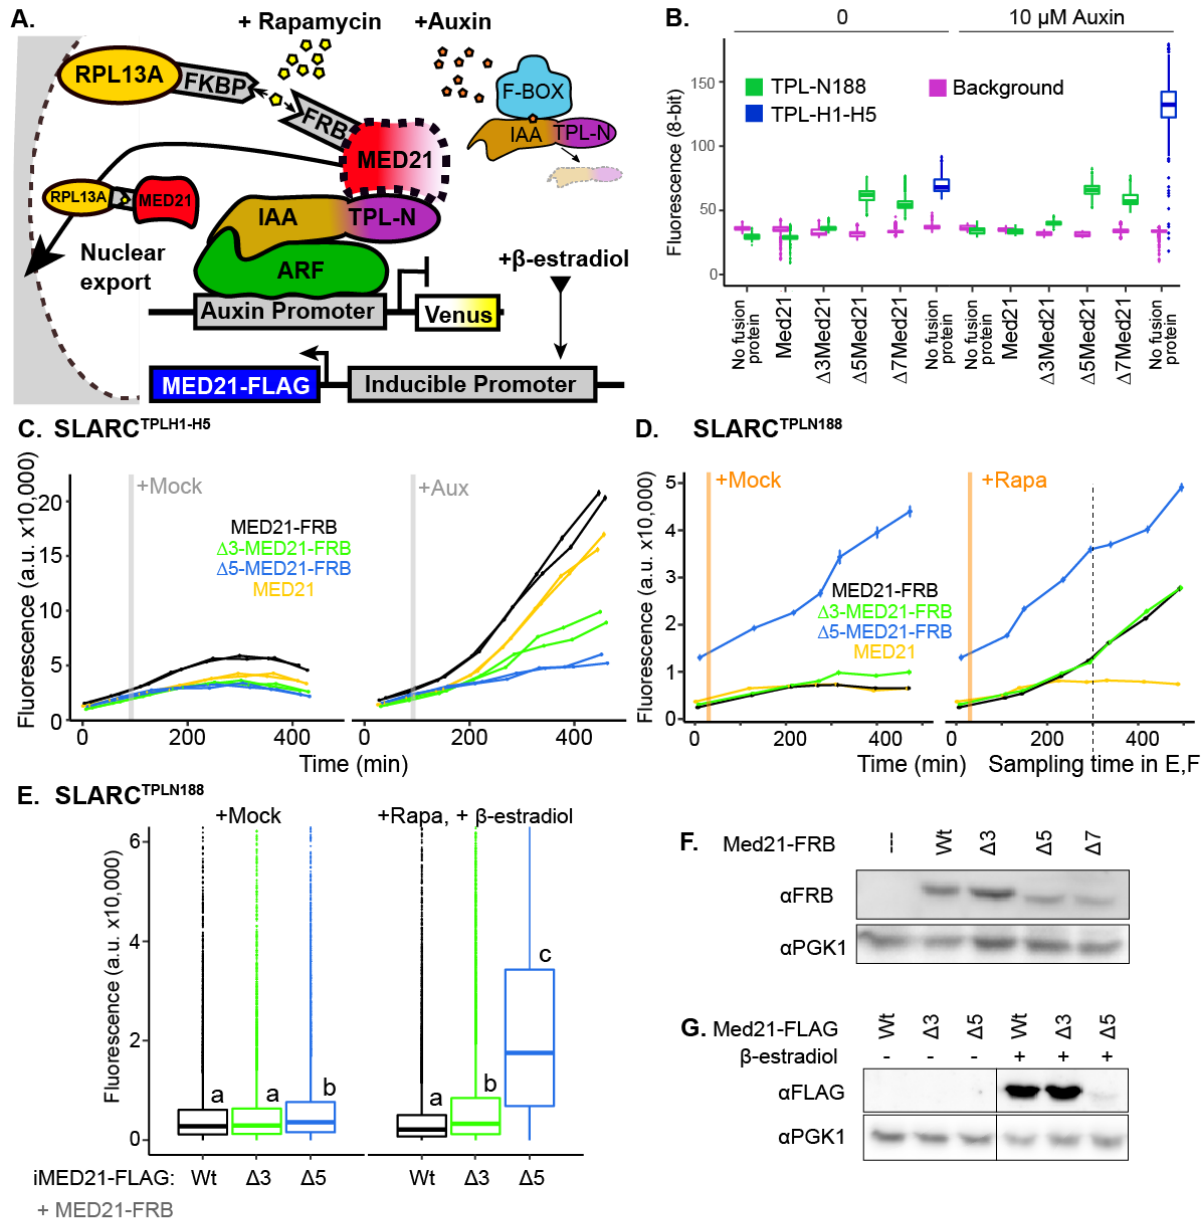

380  
 381 **Figure 4. Repression by TPL requires interaction with the N-terminus of MED21.**  
 382 **A.** Schematic of *At*ARC<sup>Sc</sup> combined with methods for inducible expression and nuclear  
 383 depletion of MED21. In Anchor Away, the yeast ribosomal protein 13A (RPL13A) is  
 384 fused to the rapamycin binding protein FKBP. Addition of Rapamycin induces  
 385 dimerization between FKBP and any target protein fused to FRB, resulting in removal of

386 the target protein from the nucleus. For these experiments, *AtARC*<sup>Sc</sup> was assembled  
387 into a single plasmid (SLARC) rather than being integrated into separate genomic loci  
388 (Figure 4 – Figure Supplement 1). Estradiol-inducible ScMed21 (iMed21) made it  
389 possible to replace wild-type MED21 with targeted deletions or mutations. **B.**  
390 Quantification of Venus fluorescence from SLARC<sup>N188</sup> in wild type and N-terminal  
391 ScMed21 deletions with and without auxin. Yeast was grown for 48 hours on SDO  
392 media with or without auxin and colony fluorescence was quantified and plotted with the  
393 auxin responsive SLARC<sup>H1-H5</sup> in wild type as a reference. Red autofluorescence was  
394 used as a reference for total cell density. **C.** Time-course flow cytometry analysis of  
395 SLARC<sup>H1-H5</sup> in wild type and n-terminal ScMed21 deletions with and without auxin.  
396 Genotypes are indicated in the colored key inset into the graph. Auxin (IAA-10 $\mu$ M) was  
397 added at the indicated time (gray bar, + Aux). **D.** Time-course flow cytometry analysis of  
398 SLARC<sup>N188</sup> in wild type and N-terminal ScMed21 deletions with and without Rapamycin.  
399 Genotypes are indicated in the colored key inset into the graph. For **(C-D)** a.u. -  
400 arbitrary units. Rapamycin was added at the indicated time (orange bar, + Rapa). Every  
401 point represents the average fluorescence of 5-10,000 individually measured yeast  
402 cells. **E.** Rapid replacement of Med21-FRB with inducible Med21-FLAG demonstrated  
403 the requirement for the ScMed21 N-terminus in TPL repression. iMed21 isoforms were  
404 induced by addition of  $\beta$ -estradiol (20 $\mu$ M) for 4 hours followed by Rapamycin addition.  
405 Fluorescence was quantified by cytometry after 300 minutes (indicated by dashed box  
406 in **D**). Lower case letters indicate significant difference (ANOVA and Tukey HSD  
407 multiple comparison test;  $p < 0.001$ ). **F-G.** Protein abundance of ScMed21 variants was  
408 tested by SDS-PAGE & western blot.

409  
410 Another potential mechanism for TPL repression is multimerization, as both the  
411 N-terminus of AtTPL and OsTPR2 adopt a tetrameric form when crystallized (Figure 5A  
412 (Ke et al., 2015; Martin-Arevalillo et al., 2017)). We used the cytoplasmic split ubiquitin  
413 (cytoSUS) protein-protein interaction assay (Asseck and Grefen, 2018) to begin to test  
414 this hypothesis. We observed that Helix 8 was required for strongest interaction  
415 between TPL constructs (Figure 5 – Figure Supplement 1A), although this assessment  
416 was complicated by the fact that some of the shorter constructs accumulated to  
417 significantly lower levels (Figure 5 – Figure Supplement 1B). The weak interaction we  
418 could observe between full length TPL-N and the Helix 1 through Helix 3 construct (H1-  
419 3), indicated that the TPL LisH domain is sufficient for dimerization. Therefore, while  
420 auxin-insensitive repression may require multimeric TPL, this higher order complex was  
421 not required for auxin-sensitive repression mediated by Helix 1 (Figure 1C-D). In their  
422 study of the AtTPL structure, Martin-Arevalillo et al. identified a triple mutation (K102S-  
423 T116A-Q117S-E122S) that abrogated the ability of the CRA domain (Helix 6 and Helix  
424 7) to form inter-TPL interactions (Martin-Arevalillo et al., 2017). As this mutant form of  
425 TPL is only capable of dimerizing through its LisH domain, we refer to it here as LDimer



426 (Figure 5A). The LDimer mutations in TPLN188 retained the same auxin insensitive  
427 repression auxin behavior as wild-type TPLN188 (Figure 5D), supporting the finding  
428 from the deletion series.

429 To make a fully monomeric form of TPL, we introduced mutations into the  
430 dimerization interface of the LisH domain in the context of LDimer. We first mutated one  
431 of a pair of interacting residues (F15) to a series of amino acids (Tyrosine - Y, Alanine -  
432 A, Arginine - R, or Aspartic Acid - D) in the context of either LDimer (Figure 5D), or H1-2  
433 (Figure 5B, 5E). We observed that conversion of F15 to the polar and charged aspartic  
434 acid (D) completely abolished repression activity, while the polar and positively charged  
435 arginine was better tolerated (Figure 5D,E). The conversion of F15 to tyrosine had no  
436 effect on LDimer (Figure 5D), and only a minimal increase in auxin sensitivity in the  
437 context of H1-2 (Figure 5E). We then combined LDimer-F15Y with a mutation of the  
438 coordinating residue L8 to serine with the intention of stabilizing the now solvent-facing  
439 residues. The repressive behavior of this mutant was indistinguishable from that of  
440 LDimer (Figure 5F). To further push the LDimer towards a monomeric form, we  
441 introduced two additional mutations (S5A, E19S, Figure 5C,G). Size exclusion  
442 chromatography confirmed that this combination of mutations (S5A-L8S-F15Y-E19S-  
443 K102S-T116A-Q117S-E122S, hereafter called Monomer) successfully shifted the  
444 majority of the protein into a monomeric state (Figure 5H); however, this shift had no  
445 observable impact on repression strength before or after auxin addition (Figure 5G). To  
446 test whether these mutations had a similar impact on *in vivo* TPL complexes, we  
447 introduced the LDimer and Monomer mutations into the cytoSUS assay. In contrast to  
448 the *in vitro* chromatography results with purified proteins, Monomer expressed in yeast  
449 retained measurable interaction with wild-type TPL, LDimer or Monomer, albeit at a  
450 reduced level than what was observed between two wild type TPLN188 constructs  
451 (Figure 5I). A caveat to this apparent difference between assays is that the Monomer  
452 mutations led to a striking increase in protein concentration in yeast (Figure 5 – Figure  
453 Supplement 1C), likely partially compensating for the decrease in affinity.

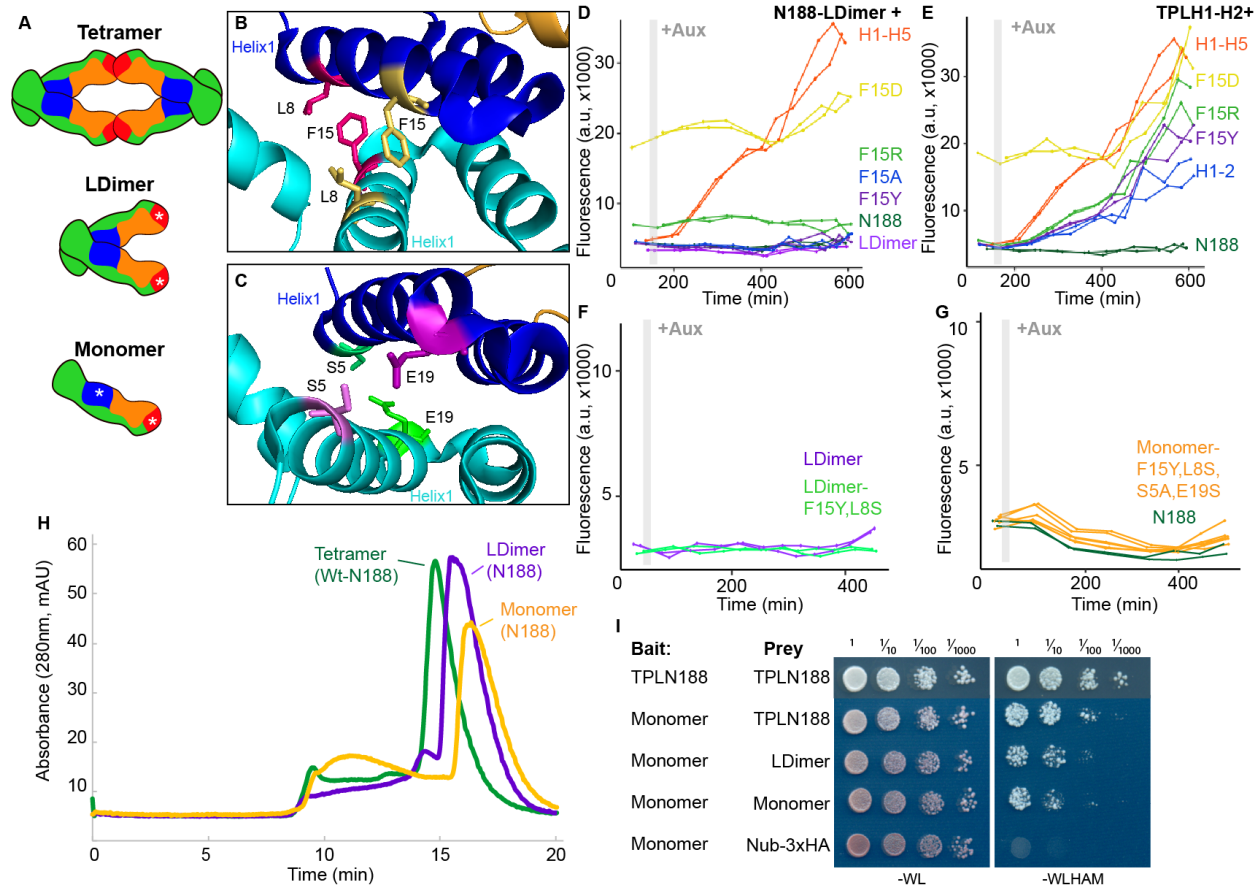

454  
455  
456  
457  
458  
459  
460  
461  
462  
463  
464  
465  
466  
467  
468  
469  
470  
471  
472

**Figure 5. Multimerization is not required for repression in yeast.** **A.** TPL can form a homotetramer via the CRA (red) and LisH (blue) domains. Asterisks indicate mutations that block or diminish these interactions. **B-C.** Locations of critical positions in Helix 1 are highlighted for two interacting TPL monomers (shown in light and dark blue). Interacting amino acids share the same color (adapted from 5N9V). **D-G.** Time course flow cytometry analysis of TPLN-IAA3 fusion proteins carrying selected single point mutations in N188-LDimer-IAA3 (**D**) and the TPLH1-2 truncation (**E**). The F15Y mutation had little effect on repression activity for either TPL construct. Double mutations (F15Y, L8S in LDimer) (**F**) or the quadruple Monomer mutations (S5A, L8S, F15Y, E19S in LDimer) (**G**) showed repression activity that was indistinguishable from LDimer or wild type N188 fused to IAA3. For all cytometry experiments, the indicated TPL construct is fused to IAA3. Every point represents the average fluorescence of 5-10,000 individually measured yeast cells (a.u. - arbitrary units). Auxin (IAA-10 $\mu$ M) was added at the indicated time (gray bar, + Aux). At least two independent experiments are shown for each construct. **H.** Size Exclusion Chromatography on TPLN188 wild type (green), LDimer (purple) and Monomer (orange) tetramerization mutants. **I.** CytoSUS on TPL tetramerization mutants.

473 While the *AtARC<sup>Sc</sup>* relies on the strong conservation of the core regulatory  
474 machinery in yeast and plants, there are important differences between the synthetic  
475 and native systems. For example, while the TPL-N188 construct (and other variants that  
476 contain Helix 8 and the linker between Helix 8 and Helix 9) repressed transcription in  
477 yeast even after auxin addition, this is not the case for the many auxin-regulated genes  
478 in plants. To probe these differences, we created a conditional expression system for  
479 plants that was based on the UAS/GAL4-VP16 system (Brand and Perrimon, 1993). In  
480 this system, the synthetic transcription factor GAL4-VP16 drove expression of a TPLN-  
481 IAA14 fusion protein that could dominantly repress the auxin response (Figure 6A). We  
482 engineered a variant of *IAA14* called *IAA14<sup>mED</sup>* which carries mutations in the EAR  
483 domain (EAR<sup>AAA</sup>) and in the degron (P306S) to block interference from the endogenous  
484 TPL/TPRs and TIR1/AFBs, respectively (Figure 6A). After prototyping the system in  
485 yeast (Figure 6- Figure Supplement 1), we transiently transformed constructs carrying  
486 *TPLN-IAA14<sup>mED</sup>* variants into *Nicotiana benthamiana* (tobacco) to test levels of  
487 repression of the well-characterized auxin response promoter DR5 (Ulmasov et al.,  
488 1997). Co-infection with *AtARF19* resulted in a roughly 3-fold increase in reporter  
489 activity (Figure 6B), sensitizing the system to detect variations in repression activity.  
490 *UAS-TPLN188-IAA14<sup>mED</sup>* was able to repress reporter expression in tobacco leaves  
491 when co-expressed with *GAL4-VP16* and *AtARF19* (Figure 6B). We observed strong  
492 correlation in repression activity between *AtARC<sup>Sc</sup>* and the transient overexpression  
493 system in tobacco for most TPL variants. Truncations containing Helix 1 (H1, H1-2, H1-  
494 5) or helix 8 (H3-8), as well as the full N-terminus (N188) repressed the DR5 reporter  
495 (Figure 6B). LDimer and Monomer variants retained a similarly strong repressive activity  
496 in tobacco as what had been observed in yeast (Figure 6B). There were some  
497 differences between the systems. Constructs with Helix 1 alone were less efficient  
498 repressors in tobacco, and the F10A mutation had little to no impact on repression  
499 strength (H1-F10A, N188-F10A, Figure 6B).

500 We were concerned that the lack of effect of multimerization mutants (LDimer  
501 and Monomer) on repression strength could still be a product of heterologous  
502 expression. To test the effect of these mutants in a native context, we generated  
503 transgenic *Arabidopsis* lines where the UAS-TPL-IAA14<sup>mED</sup> constructs were activated in  
504 the root pericycle cells where IAA14 normally functions to regulate initiation of new roots  
505 (Figure 6C, inset). To do this, we first had to introgress the J0121 enhancer trap which  
506 drives expression of both GAL4-VP16 and GFP in pericycle cells (Laplaze et al., 2005)  
507 into Col-0 (J0121<sup>Col-0</sup>). We then transformed J0121<sup>Col-0</sup> with our UAS-TPL-IAA14<sup>mED</sup>  
508 constructs. A plant carrying a functional TPL variant fused to a stabilized IAA14 should  
509 make very few if any lateral roots, phenocopying the original solitary root (*slr*) mutant  
510 (Fukaki et al., 2002). As expected, transformants expressing either IAA14<sup>mED</sup> (with no  
511 TPL fusion) or TPLN188 (with no IAA14 fusion) had no effect on lateral root production.  
512 In contrast, TPLN188-IAA14<sup>mED</sup> fusion constructs sharply decreased lateral root density

513 (Figure 6C). Both LDimer-IAA14<sup>mED</sup> and Monomer-IAA14<sup>mED</sup> constructs (Figure 6C)  
514 were able to repress lateral root development, suggesting that multimer formation is not  
515 required for TPL repression of native auxin-induced genes.

516 In addition to understanding the native function of TPL, we were also interested  
517 in characterizing minimal, orthogonal repression domains to use in synthetic circuits. At  
518 18 amino acids long, TPL-H1 is among the shortest repression domains identified to  
519 date, and it functions in both yeast and plants (Figures 1D, 2A-D, 6B). Residues within  
520 Helix 1 are highly conserved within *Arabidopsis* accessions (Hamm et al., 2019), and  
521 this conservation can be observed as far back as Embryophytes (approximately 400  
522 million years of conservation (Martin-Arevalillo et al., 2019), Figure 6 – Figure  
523 supplement 2). LisH domains are found in diverse proteins across eukaryotes, and we  
524 were curious whether other LisH -containing proteins could be mined for similar short,  
525 modular repression domains. A phylogenetic tree revealed a cluster of LisH-containing  
526 proteins characterized as having repressor activity (Figure 6 – Figure Supplement 3).  
527 This cluster included TBL1 from humans (Oberoi et al., 2011) and HOS15 from  
528 *Arabidopsis* (Mayer et al., 2019). An alignment of selected LisH domains within this  
529 clade (PF08513) revealed extensive sequence diversity, especially within the regions  
530 homologous to Helix 1 (Figure 6D, Figure 6 – Figure Supplement 3). As there is a  
531 striking similarity in TPL and TBL1 structures (Martin-Arevalillo et al., 2017), we used  
532 TBL1 as a proof-of-principle for identifying new modular repression domains. We found  
533 that indeed the first 98 amino acids of TBL1 fused to IAA3 could act as a repression  
534 domain (Figure 6F), and a truncation containing only the first helix of the LisH domain  
535 (TBL1-H1) had an equally high level of repressive activity. Like TPL-H1, repression by  
536 TBL-H1 was also reversed by addition of auxin (Figure 6E). TBL1N98 doesn't interact  
537 with ScMed21 or AtMED21 (Figure 6 – Figure Supplement 4), consistent with this  
538 interaction residing in Helix 8 of TPL.

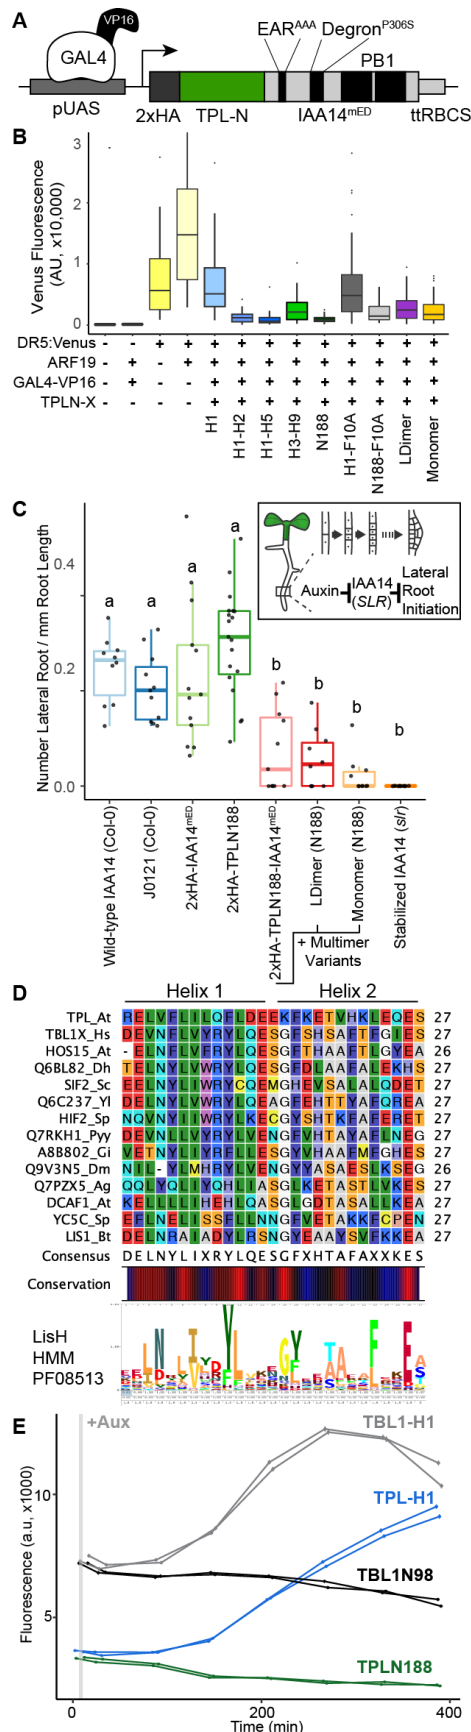

**Figure 6. TPL repression domains behave similarly in yeast and plants, and they can be used to identify novel repression domains from structurally-related proteins. A.** Design of UAS-TPL-IAA14<sup>mED</sup> constructs. Mutation of the conserved Lysine residues in the EAR domain disrupted potential interactions with endogenous TPL/TPR proteins. The IAA14 degron has been mutated (P306S) to render it auxin insensitive. UAS – upstream activating sequence, ttRBCS - Rubisco terminator sequence. **B.** Transient expression of indicated TPL constructs in *Nicotiana benthamiana* leaves. DR5:Venus - the synthetic DR5 auxin promoter (Ulmasov et al., 1997) driving Venus, ARF19 - p35S:AtARF19-1xFLAG, GAL4:VP16 - pUBQ10:GAL4-VP16, TPLN-X - UAS-TPL-IAA14<sup>mED</sup> with various TPL truncations or mutations. **C.** Auxin induced degradation of IAA14 is absolutely required for initiation of lateral root development (cartoon inset). N-terminal domains of TPL were sufficient to repress the development of lateral roots in *Arabidopsis* seedlings. The density of emerged lateral roots was measured in T1 seedlings at 14 days after germination. Lower case letters indicate significant difference (ANOVA and Tukey HSD multiple comparison test; p<0.001). **D.** Alignment of TPL with related LisH domains from PFAM08513. Residues are colored according to the Rasmol color scheme. The LisH Hidden Markov Models (HMM) from PFAM is aligned below to allow interpretation of broader LisH domain conservation (Schuster-Böckler et al., 2004). **E.** The Human TBL1 N-terminal domain could replace TPL in *AtARC*<sup>Sc</sup>. The TBL1 N terminus (N98) or the TBL1 Helix 1 (TBL1-H1) was translationally fused to IAA3 and compared to TPLN188 and TPLH1 in time course auxin response assays. Auxin (IAA-10µM) was added at the indicated time (gray bar, + Aux).

## 579 Discussion

580 A review of the current literature on corepressors gives the conflicting  
581 impressions that (a) corepressor function is broadly conserved, and (b) that every  
582 organism (and perhaps even each corepressor) has a distinct mode for transcriptional  
583 repression (Adams et al., 2018; Mottis et al., 2013; Perissi et al., 2010; Wong and  
584 Struhl, 2011). We hoped that the *AtARC<sup>Sc</sup>* could facilitate a resolution to this apparent  
585 contradiction by targeting repression to a single synthetic locus. We focused our initial  
586 efforts on the analysis of the N-terminal portion of TPL which has multiple known  
587 protein-protein interaction surfaces (Ke et al., 2015; Martin-Arevalillo et al., 2017).  
588 Experiments with the *AtARC<sup>Sc</sup>* identified two repression domains [Helix 1 and Helix 8  
589 (Figures 1-2)] within the N-terminus of TPL, both of which were subsequently confirmed  
590 to repress transcription in plants as well. Amino acids within each helix that were critical  
591 for repression activity have their R-groups oriented away from the hydrophobic core of  
592 TPL structure. This led us to hypothesize that they are therefore likely contact points for  
593 other proteins (Figure 2). In the case of Helix 8, we were able to identify one of these  
594 partners—MED21—a Mediator subunit that also interacts with the yeast corepressor  
595 Tup1 (Figure 3, 4). This result suggests a fundamental conservation in at least one  
596 corepressor mechanism across species. Contrary to our initial hypothesis, the  
597 monomeric form of TPL was sufficient for strong repression in yeast and in plants,  
598 leaving open the question of the role of higher-order TPL complex formation (Figure 5).  
599 Finally, we were able to show that the Helix 1 repression domain can be used to identify  
600 additional modular repression domains from diverse species (Figure 6).

601 The Mediator complex is a multi-subunit complex that connects DNA-bound  
602 transcription factors and the RNA polymerase II complex (Pol-II) to coordinate gene  
603 expression, first identified in yeast (Flanagan et al., 1991; Kim et al., 1994). The  
604 Mediator subunits in yeast are organized into four separate modules; head, middle, tail  
605 and kinase, with a strong conservation of module components in plants (Dolan and  
606 Chapple, 2017; Maji et al., 2019; Malik et al., 2017; Samanta and Thakur, 2015).  
607 MED21 forms a heterodimer with MED7 to create the central region of the Middle region  
608 of the Mediator complex, and the MED21 N-terminus is centered on a flexible hinge  
609 region (Baumli et al., 2005), which is required for Pol-II recruitment and CDK8 kinase  
610 module recruitment (Sato et al., 2016). The protein interaction between TPL and MED21  
611 occurs at the N-terminus of MED21, highlighting the importance of this region as a  
612 signaling hub (Sato et al., 2016). Other lines of evidence support this role, as this region  
613 binds the yeast homolog of TPL, Tup1 (Gromöller and Lehming, 2000) through a  
614 completely different protein domain as no homology can be found between TPL helix 8  
615 and Tup1 in any region by primary amino acid homology (i.e. BLAST).

616 Corepressors coordinate multiple mechanisms of repression through discrete  
617 protein interactions, leading to robust control over eukaryotic transcription by combining  
618 repression modalities. Corepressor function has variously been linked to (i) altering

619 chromatin confirmation, often through interaction with histone modifying proteins or  
620 histone proteins themselves, (ii) direct interference with transcription factor binding or  
621 function and (iii) physical spreading of long-range oligomeric corepressor complexes  
622 across regions of regulatory DNA (Perissi et al., 2010). Dissection of the importance of  
623 each modality in Tup1 repression has been challenging (Lee et al., 2000; Zhang and  
624 Reese, 2004). The tour-de-force of corepressor mechanism studies in yeast concluded  
625 that the primary function of Tup1 was to physically block activators (Wong and Struhl,  
626 2011). In this work, the authors utilized the Anchor Away approach to correlate the  
627 importance of HDACs, transcriptional machinery and chromatin remodeling enzymes to  
628 the repression state of endogenously repressed *Cyc8-Tup1* target genes. They  
629 observed that Tup1 did not block the binding of transcription factors but inhibited the  
630 recruitment of one Mediator component in the tail domain, GAL11/MED15, as well as  
631 Pol-II and the chromatin remodelers Snf2 and Sth1. They additionally observed that  
632 HDACs had only a supportive role in reinforcing Tup1 repression. These results led to  
633 their hypothesis that Tup1 blocks the activation domains of transcription factors, and  
634 suggested this was through direct binding to activation domains (Wong and Struhl,  
635 2011).

636 The synthetic system used here allowed us to build on this model and further  
637 refine our understanding of TPL's repressive activity. In our experiments we see a  
638 similar set of conditions, with TPL recruited to the DNA-bound transcriptional activator  
639 (ARF), and several possible mechanisms of repression. Unlike Tup1, we have  
640 subdivided the TPL protein to identify interactions between TPL and individual protein  
641 interactors with no effect on yeast function. In these experiments we can eliminate the  
642 possibility that TPL blocks ARF activation by directly blocking the transcription factor  
643 activation domains because we see a loss of repression only when TPL-MED21 binding  
644 is eliminated through specific point mutations (Figure 3E). Our inducible swap of MED21  
645 isoforms also corroborates these findings (Figure 4), as the SLARC remains genetically  
646 identical in these strains, indicating that TPL-MED21 interaction is regulating activity not  
647 a TPL-ARF interaction. Furthermore, our results correlate well with findings that  
648 repressed targets are reactivated when this portion of MED21 is deleted in yeast (TPL -  
649 Figure 4, Tup1 - (Gromöller and Lehming, 2000)). Therefore, we suggest that instead of  
650 directly binding activation domains that TPL (and likely Tup1) binds to components of  
651 Mediator (MED21 and possibly others) recruited by the transcription factor. Indeed, it is  
652 easier to rationalize that the repressor binds the same domains of the Mediator complex  
653 recruited by the transcription factor's activation domain (with the same affinity) as  
654 opposed to binding each diverse activation domain (with varying affinity). In this model,  
655 corepressor binding to Mediator components inhibits them from forming a fully active  
656 Mediator complex, Polymerase II recruitment and promoter escape, the main roles of  
657 the Mediator complex (Petrenko et al., 2017).

658 TPL interaction with MED21 has implications for the dynamics of transcriptional  
659 activation. By stabilizing the Mediator complex, TPL (and by extension Tup1) may  
660 create a 'pre-paused' state that allows rapid recruitment of Pol-II and activation once  
661 TPL is removed. Alternatively, TPL could allow for recruitment of a poised or paused  
662 Pol-II, allowing for rapid activation (and re-activation) of a repressed locus. Support for  
663 this idea comes from the genome-wide correlation between Groucho corepressor  
664 binding and polymerase pausing in *Drosophila* (Kaul et al., 2014). However, in non-  
665 metazoan lineages (i.e. plants and yeast) the existence of bona fide pausing is  
666 disputed, mainly due to the absence of the pausing regulator Negative Elongation  
667 Factor complex (NELF, (Gaertner and Zeitlinger, 2014)). One possibility is that plants  
668 and yeast have an alternative or more primitive form of pausing that is NELF-  
669 independent. Support for this idea comes from studies of *Arabidopsis* where Pol-II was  
670 found to be markedly enriched at the five-prime ends of genes, the same pattern seen  
671 with pausing (Zhu et al., 2018). In yeast, Tup1 has been implicated in a form of  
672 transcriptional memory that involves recruiting a poised form of preinitiation Pol-II to  
673 allow rapid reactivation of genes involved in sugar utilization (Sood et al., 2017).

674 Multiple points of contact likely exist between the Mediator complex and other  
675 parts of the transcriptional machinery in both transcriptionally repressed and active  
676 states. For auxin response, specifically, there are several lines of evidence to support  
677 this model, including documented association between the structural backbone of  
678 Mediator, MED14, and activated and repressed auxin loci in *Arabidopsis* (Ito et al.,  
679 2016). In addition, MED12 and MED13 are required for auxin-responsive gene  
680 expression in the root, and MED12 acts upstream of AUX1 in the root growth response  
681 to sugar (Raya-González et al., 2018). MED18 in the head module represses auxin  
682 signaling and positively regulates the viability of the root meristem (Raya-González et  
683 al., 2018). PFT1/MED25 regulates auxin transport and response in the root (Raya-  
684 González et al., 2014). MED7, MED21's partner protein in the hinge domain, is required  
685 for normal root development and loss of MED7 function impacts expression of auxin  
686 signaling components (Kumar et al., 2018). Previous research identified the Mediator  
687 CDK8 subunit, specifically MED13 (MAB2), as an interactor with the full-length TPL  
688 protein (Ito et al., 2016). We could not observe interaction between the N-terminal  
689 domain of TPL and AtMED13, AtCYC8, or AtCYCC (Figure Supplement 2), suggesting  
690 that any direct interactions occur outside the N188 fragment. As suggested by Ito and  
691 colleagues (Ito et al., 2016) and supported by our synthetic system, auxin-induced  
692 removal of TPL is sufficient to induce changes in the composition of the Mediator  
693 complex, facilitating both rapid activation and rapid return to a repressed basal state.

694 While TPL can form higher order multimer states that may have altered  
695 repression dynamics, multimerization is not required for repression in our experiments.  
696 Formation of tetrameric TPL has been suspected to increase repression of target  
697 genes, either by increasing the local concentration of TPL for interaction with partner



698 proteins, or by allowing higher-order chromatin compaction for example by physical  
699 interaction with histone tails (Ma et al., 2017). The loss of dimerization through the CRA  
700 domain (what we call LDimer in this study) was found to have no effect on  
701 transcriptional repression of the DR5 promoter in protoplasts (Martin-Arevalillo et al.,  
702 2017). Similarly, we found that LDimer and Monomer forms of TPL were effective  
703 corepressors in yeast and in plants. One caveat from our data is that we tested  
704 everything in the context of the auxin response pathway. It is entirely possible that other  
705 TPL-regulated loci that are not auxin-regulated have different requirements.

706 Rapid state switching triggered by small molecule-induced protein degradation is  
707 among the many properties of the auxin system that make it an attractive candidate for  
708 continued prospecting for new parts to use in synthetic biology applications. The  
709 clustering of TPL and TBL1 with LisH domains from diverse phyla (Figure 6, Figure 6 –  
710 Figure supplement 1), in combination with *AtARC<sup>Sc</sup>*, should allow for rapid assembly of  
711 a large set of repression domains with diverse sequences and a range of strengths and  
712 dynamic properties. Once a core set of repression domains has been identified, they  
713 can likely be further optimized for a given specification (e.g., *in vivo* computation  
714 such as in (Gander et al., 2017)). Our current tools to repress transcriptional output in  
715 plants are limited, and frequently depend on recruitment of endogenous TPL/TPR  
716 complexes to a synthetic EAR domain (SRDX - (Hiratsu et al., 2003)) or fusion of the  
717 TPL N-terminal domain to transcription factors (HACR - (Khakhar et al., 2018)). The  
718 development of a graded set of repression domains that act orthogonally to the  
719 endogenous TPL/TPR corepressors will allow an expansion of the synthetic circuitry  
720 possible in plants.

721 **Methods**

722

723 **Cloning**

724 Construction of TPL-IAA3 and TPL-IAA14 fusion proteins were performed as described  
725 in (Pierre-Jerome et al., 2014). Variant and deletion constructs were created using  
726 PCR-mediated site directed mutagenesis. Site-directed mutagenesis primers were  
727 designed using NEBasechanger and implemented through Q5® Site-Directed  
728 Mutagenesis (NEB, Cat #E0554S). TPL interactor genes were amplified as cDNAs from  
729 wild type Col-0 RNA using reverse transcriptase (SuperScript™ IV Reverse  
730 Transcriptase, Invitrogen) and gene specific primers from IDT (Coralville, Iowa),  
731 followed by amplification with Q5 polymerase (NEB). These cDNAs were subsequently  
732 cloned into Plasmids for cytoSUS using a Gibson approach (Gibson et al., 2009),  
733 through the Aquarium Biofabrication facility (Ben Keller et al., 2019). The coding  
734 sequence of the genes of interest were confirmed by sequencing (Genewiz; South  
735 Plainfield, NJ). For UAS driven constructs, the TPLN188-IAA14 coding sequence was  
736 amplified with primers containing engineered BsaI sites and introduced into the pGII  
737 backbone with the UAS promoter and RBSC terminator (Siligato et al., 2016) using  
738 Golden Gate cloning (Weber et al., 2011). Subsequent mutations were performed on  
739 this backbone using PCR-mediated site directed mutagenesis (See above).  
740 Construction of C-terminal 2xFRB fusions for Anchor Away were constructed as  
741 described in (Haruki et al., 2008). Inducible MED21 was constructed as described in  
742 (Mclsaac et al., 2013).

743

744 **Flow Cytometry**

745 Fluorescence measurements were taken using a Becton Dickinson (BD) special order  
746 cytometer with a 514-nm laser exciting fluorescence that is cutoff at 525 nm prior to  
747 photomultiplier tube collection (BD, Franklin Lakes, NJ). Events were annotated, subset  
748 to singlet yeast using the flowTime R package (Wright et al., 2019). A total of 10,000 -  
749 20,000 events above a 400,000 FSC-H threshold (to exclude debris) were collected for  
750 each sample and data exported as FCS 3.0 files for processing using the flowCore R  
751 software package and custom R scripts (Supplemental File 1, (Havens et al., 2012;  
752 Pierre-Jerome et al., 2017)). Data from at least two independent replicates were  
753 combined and plotted in R (ggplots2).

754

755 **Yeast Methods**

756 Standard yeast drop-out and yeast extract-peptone-dextrose plus adenine (YPAD)  
757 media were used, with care taken to use the same batch of synthetic complete (SC)  
758 media for related experiments. A standard lithium acetate protocol (Gietz and Woods,  
759 2002) was used for transformations of digested plasmids. All cultures were grown at  
760 30°C with shaking at 220 rpm. Anchor-Away approaches were followed as described in

761 (Haruki et al., 2008), and anchor away strains were obtained from EURO-SCARF  
762 (euroscarf.de). Endogenous genomic fusions of ScMed21-FRB were designed by fusing  
763 MED21 homology to the pFA6a-FRB-KanMX6 plasmid for chromosomal integration into  
764 the parental anchor away strain as in (Petrenko et al., 2017), selectable through G418  
765 resistance (G418, Geneticin, Thermo Fisher Scientific). Tup1-FRB and Cyc8-FRB were  
766 constructed as described in (Wong and Struhl, 2011). SLARC construction required a  
767 redesign of promoters and terminators used in the AtARCSc to eliminate any repetitive  
768 DNA sequences (See Figure 4 – Figure Supplement 1), using a Golden Gate cloning  
769 approach into level 1 vectors. Subsequent assembly of individual transcriptional units  
770 into a larger plasmid utilized VEGAS assembly which was performed as described in  
771 (Mitchell et al., 2015). To create an acceptor plasmid for the assembled transcriptional  
772 units, we synthesized a custom vector containing VA1 and VA2 homology sites for  
773 recombination (Twist Bioscience, South San Francisco, CA). In between these sites we  
774 incorporated a pLac:mRFP cassette to allow identification of uncut destination plasmid  
775 in *E. coli*, flanked by EcoRI sites for linearization. Finally, the CEN6/ARSH4 was  
776 transferred from pRG215 (Addgene #64525) into the acceptor plasmid by Golden Gate  
777 reaction using designed BsmBI sites engineered into the acceptor plasmid and the  
778 primers used to amplify the CEN/ARS (See Figure 4 – Figure Supplement 1). For the  
779 cytoplasmic split-ubiquitin protein-protein interaction system, bait and prey constructs  
780 were created using the plasmids pMetOYC and pNX32, respectively (Addgene,  
781 [https://www.addgene.org/Christopher\\_Grefen/](https://www.addgene.org/Christopher_Grefen/)). Interaction between bait and prey  
782 proteins were evaluated using a modified version of the split ubiquitin technique (Asseck  
783 and Grefen, 2018). After two days of growth on control and selection plates, images  
784 were taken using a flatbed scanner (Epson America, Long Beach, CA). Inducible  
785 ScMed21 strains (iMed21) were grown overnight, and then diluted back to 100 events  
786 per microliter as determined by flow cytometry and grown at 30C with 250rpm in a  
787 deepwell 96-well plate format. Strains were supplemented with  $\beta$ -estradiol (20 $\mu$ M) for 4  
788 hours followed by Rapamycin addition. Samples were analyzed by flow cytometry  
789 throughout these growth experiments.

790

## 791 **Western Blot**

792 Yeast cultures that had been incubated overnight in synthetic complete (SC) media  
793 were diluted to OD600 = 0.6 and incubated until cultures reached OD600 ~1. Cells  
794 were harvested by centrifugation. Cells were lysed by vortexing for 5 min in the  
795 presence of 200  $\mu$ l of 0.5-mm diameter acid washed glass beads and 200  $\mu$ l SUMEB  
796 buffer (1% SDS, 8 M urea, 10 mM MOPS pH 6.8, 10 mM EDTA, 0.01% bromophenol  
797 blue, 1mM PMSF) per one OD unit of original culture. Lysates were then incubated at  
798 65° for 10 min and cleared by centrifugation prior to electrophoresis and blotting.  
799 Antibodies: Anti-HA-HRP (REF-12013819001, Clone 3F10, Roche/Millipore Sigma, St.  
800 Louis, MO), Anti-FLAG (F3165, Monoclonal ANTI-FLAG® M2, Millipore Sigma, St.

801 Louis, MO), Anti-FRB (ALX-215-065-1, Enzo Life Sciences, Farmingdale, NY, (Haruki et  
802 al., 2008)).

803

### 804 **Protein expression and purification**

805 All multimer deficient TPL proteins were expressed in *Escherichia coli* Rosetta 2 strain.  
806 Bacteria cultures were grown at 37°C until they achieved an OD<sup>600</sup>nm of 0.6-0.9. Protein  
807 expression was induced with isopropyl-β-D-1-thyogalactopiranoside (IPTG) at a final  
808 concentration of 400 μM at 18 °C overnight. Bacteria cultures were centrifuged and the  
809 pellets were resuspended in the buffer A (CAPS 200 mM pH 10.5, NaCl 500 mM, TCEP  
810 1 mM), where cells were lysed by sonication. His-tagged AtTPL188 (wt and mutants)  
811 bacteria pellets were resuspended in buffer A with EDTA-free antiprotease (Roche).  
812 The soluble fractions recovered after sonication were passed through a Ni-sepharose  
813 (GE Healthcare) column previously washed with buffer A and the bound proteins were  
814 eluted with buffer A with 300 mM imidazole. A second purification step was carried out  
815 on Gel filtration Superdex 200 10/300 GL (GE Healthcare) equilibrated with buffer A.

816

### 817 **Protein Alignments**

818 The TPL LisH domain was added to an alignment of seed sequences for PFAM08513  
819 containing 50 seed sequences (the curated alignment from which the HMM for the  
820 family is built). These were aligned using CLC Sequence Viewer 7, a tree was  
821 constructed using a Neighbor Joining method, and bootstrap analysis performed with  
822 10,000 replicates.

823

### 824 **Plant growth**

825 *Agrobacterium* mediated transient transformation of *Nicotiana benthamiana* was  
826 performed as per (Yang et al., 2000). 5 ml cultures of *agrobacterium* strains were grown  
827 overnight at 30C shaking at 220rpm, pelleted and incubated in MMA media (10 mM  
828 MgCl<sub>2</sub>, 10 mM MES pH 5.6, 100 μM acetosyringone) for 3 hours at room temperature  
829 with rotation. Strain density was normalized to an OD<sub>600</sub> of 1 for each strain in the final  
830 mixture of strains before injection into tobacco leaves. Leaves were removed, and 8  
831 different regions were excised using a hole punch, placed into a 96-well microtiter plate  
832 with 100μl of water. Each leaf punch was scanned in a 4x4 grid for yellow and red  
833 fluorescence using a plate scanner (Tecan Spark, Tecan Trading AG, Switzerland).  
834 Fluorescence data was quantified and plotted in R (ggplots). For *Arabidopsis thaliana*  
835 experiments, J0121 was introgressed eight times into Col-0 accession from the C24  
836 accession, rigorously checked to ensure root growth was comparable to Col-0 before  
837 use. UAS-TPL-IAA14<sup>mED</sup> constructs were introduced to J0121 introgression lines by  
838 floral dip method (Clough and Bent, 1998). T1 seedlings were selected on 0.5X LS  
839 (Caisson Laboratories, Smithfield, UT) + 25μg/ml Hygromycin B (company) + 0.8%  
840 phytoagar (Plantmedia; Dublin, OH). Plates were stratified for 2 days, exposed to light

841 for 6 h, and then grown in the dark for 3 d following a modification of the method of  
842 (Harrison et al., 2006). Hygromycin resistant seedlings were identified by their long  
843 hypocotyl, enlarged green leaves and long root. Transformants were transferred by  
844 hand to fresh 0.5X LS plates + 0.8% Bacto agar (Thermo Fisher Scientific) and grown  
845 vertically for 14 days at 22°C. Plates were scanned on a flatbed scanner (Epson  
846 America, Long Beach, CA) at day 14. *slr* seeds were obtained from the Arabidopsis  
847 Biological Resource Center (Columbus, OH).

848

#### 849 **Data Submissions**

850 All flow cytometry data will be deposited at <https://flowrepository.org/>. All plasmids will  
851 be deposited through Addgene at [https://www.addgene.org/Jennifer\\_Nemhauser/](https://www.addgene.org/Jennifer_Nemhauser/).

852

#### 853 **Acknowledgements**

854 We would like to thank Prof. Jef Boeke for kindly providing VEGAS adaptor and  
855 regulatory element plasmids; Dr. Jennifer Brophy and Prof. José Dinneny for kindly  
856 providing the pUBQ10:GAL4:VP16 plasmid; and Prof. Grant Brown and Prof. Maitreya  
857 Dunham for advice on yeast genetics and approaches. We thank members of the  
858 Nemhauser group including Amy Lanctot, Romi Ramos, Eric Yang, and Dr. Sarah  
859 Guiziou for constructive discussions and comments on this manuscript. We also thank  
860 Morgan Hamm for the custom R script used here to analyze anchor away plates.

861

#### 862 **Funding**

863 National Institutes of Health (NIH): ARL, SJS, JEZ, MZ & JLN R01- GM107084  
864 Howard Hughes Medical Institute (HHMI): ARL, SJS, JEZ, MZ & JLN - Faculty Scholar  
865 Award. Ning Zheng is a Howard Hughes Medical Institute Investigator. ARL is  
866 supported by the Simons Foundation through the Life Science Research Foundation.

867

## 868 **References**

- 869 Adams GE, Chandru A, Cowley SM. 2018. Co-repressor, co-activator and general transcription  
870 factor: the many faces of the Sin3 histone deacetylase (HDAC) complex. *Biochem J*  
871 **475**:3921–3932. doi:10.1042/BCJ20170314
- 872 Agarwal M, Kumar P, Mathew SJ. 2015. The Groucho/Transducin-like enhancer of split protein  
873 family in animal development. *IUBMB Life* **67**:472–481. doi:10.1002/iub.1395
- 874 Asseck LY, Grefen C. 2018. Detecting Interactions of Membrane Proteins: The Split-Ubiquitin  
875 System. *Methods Mol Biol Clifton NJ* **1794**:49–60. doi:10.1007/978-1-4939-7871-7\_4
- 876 Baumli S, Hoepfner S, Cramer P. 2005. A Conserved Mediator Hinge Revealed in the Structure  
877 of the MED7·MED21 (Med7·Srb7) Heterodimer. *J Biol Chem* **280**:18171–18178.  
878 doi:10.1074/jbc.M413466200
- 879 Ben Keller, Justin Vrana, Abraham Miller, Garrett Newman, Eric Klavins. 2019. Aquarium: The  
880 Laboratory Operating System. Zenodo. doi:10.5281/zenodo.2535715
- 881 Bourbon H-M. 2008. Comparative genomics supports a deep evolutionary origin for the large,  
882 four-module transcriptional mediator complex. *Nucleic Acids Res* **36**:3993–4008.  
883 doi:10.1093/nar/gkn349
- 884 Brand AH, Perrimon N. 1993. Targeted gene expression as a means of altering cell fates and  
885 generating dominant phenotypes. *Dev Camb Engl* **118**:401–415.
- 886 Busch W, Miotk A, Ariel FD, Zhao Z, Forner J, Daum G, Suzuki T, Schuster C, Schultheiss SJ,  
887 Leibfried A, Haubeiss S, Ha N, Chan RL, Lohmann JU. 2010. Transcriptional control of a  
888 plant stem cell niche. *Dev Cell* **18**:849–861. doi:10.1016/j.devcel.2010.03.012
- 889 Causier B, Ashworth M, Guo W, Davies B. 2012. The TOPLESS interactome: a framework for  
890 gene repression in Arabidopsis. *Plant Physiol* **158**:423–438. doi:10.1104/pp.111.186999
- 891 Chen G, Courey AJ. 2000. Groucho/TLE family proteins and transcriptional repression. *Gene*  
892 **249**:1–16. doi:10.1016/s0378-1119(00)00161-x
- 893 Clough SJ, Bent AF. 1998. Floral dip: a simplified method for Agrobacterium-mediated  
894 transformation of Arabidopsis thaliana. *Plant J Cell Mol Biol* **16**:735–743.
- 895 Collins J, O'Grady K, Chen S, Gurley W. 2019. The C-terminal WD40 repeats on the TOPLESS  
896 co-repressor function as a protein–protein interaction surface. *Plant Mol Biol* **100**:47–58.  
897 doi:10.1007/s11103-019-00842-w
- 898 Delto CF, Heisler FF, Kuper J, Sander B, Kneussel M, Schindelin H. 2015. The LisH motif of  
899 muskellin is crucial for oligomerization and governs intracellular localization. *Struct Lond*  
900 *Engl* **1993** **23**:364–373. doi:10.1016/j.str.2014.11.016
- 901 Dolan WL, Chapple C. 2017. Conservation and Divergence of Mediator Structure and Function:  
902 Insights from Plants. *Plant Cell Physiol* **58**:4–21. doi:10.1093/pcp/pcw176
- 903 Flanagan PM, Kelleher RJ, Sayre MH, Tschochner H, Kornberg RD. 1991. A mediator required  
904 for activation of RNA polymerase II transcription in vitro. *Nature* **350**:436–438.  
905 doi:10.1038/350436a0
- 906 Flowers EB, Poole RJ, Tursun B, Bashllari E, Pe'er I, Hobert O. 2010. The Groucho ortholog  
907 UNC-37 interacts with the short Groucho-like protein LSY-22 to control developmental  
908 decisions in *C. elegans*. *Dev Camb Engl* **137**:1799–1805. doi:10.1242/dev.046219
- 909 Fukaki H, Tameda S, Masuda H, Tasaka M. 2002. Lateral root formation is blocked by a gain-  
910 of-function mutation in the SOLITARY-ROOT/IAA14 gene of Arabidopsis. *Plant J Cell*  
911 *Mol Biol* **29**:153–168.
- 912 Gaertner B, Zeitlinger J. 2014. RNA polymerase II pausing during development. *Development*  
913 **141**:1179–1183. doi:10.1242/dev.088492
- 914 Gander MW, Vrana JD, Voje WE, Carothers JM, Klavins E. 2017. Digital logic circuits in yeast  
915 with CRISPR-dCas9 NOR gates. *Nat Commun* **8**:15459. doi:10.1038/ncomms15459
- 916 Gasperowicz M, Otto F. 2005. Mammalian Groucho homologs: redundancy or specificity? *J Cell*  
917 *Biochem* **95**:670–687. doi:10.1002/jcb.20476

- 918 Gibson DG, Young L, Chuang R-Y, Venter JC, Hutchison CA, Smith HO. 2009. Enzymatic  
919 assembly of DNA molecules up to several hundred kilobases. *Nat Methods* **6**:343–345.  
920 doi:10.1038/nmeth.1318
- 921 Gietz RD, Woods RA. 2002. Transformation of yeast by lithium acetate/single-stranded carrier  
922 DNA/polyethylene glycol method. *Methods Enzymol* **350**:87–96. doi:10.1016/s0076-  
923 6879(02)50957-5
- 924 Gonzalez N, Pauwels L, Baekelandt A, De Milde L, Van Leene J, Besbrugge N, Heyndrickx KS,  
925 Cuéllar Pérez A, Durand AN, De Clercq R, Van De Slijke E, Vanden Bossche R,  
926 Eeckhout D, Gevaert K, Vandepoele K, De Jaeger G, Goossens A, Inzé D. 2015. A  
927 Repressor Protein Complex Regulates Leaf Growth in Arabidopsis. *Plant Cell* **27**:2273–  
928 2287. doi:10.1105/tpc.15.00006
- 929 Grbavec D, Lo R, Liu Y, Stifani S. 1998. Transducin-like Enhancer of split 2, a mammalian  
930 homologue of Drosophila Groucho, acts as a transcriptional repressor, interacts with  
931 Hairy/Enhancer of split proteins, and is expressed during neuronal development. *Eur J*  
932 *Biochem* **258**:339–349.
- 933 Gromöller A, Lehming N. 2000. Srb7p is a physical and physiological target of Tup1p. *EMBO J*  
934 **19**:6845–6852. doi:10.1093/emboj/19.24.6845
- 935 Hallberg M, Hu G-Z, Tronnorsjö S, Shaikhibrahim Z, Balciunas D, Björklund S, Ronne H. 2006.  
936 Functional and physical interactions within the middle domain of the yeast mediator. *Mol*  
937 *Genet Genomics MGG* **276**:197–210. doi:10.1007/s00438-006-0135-7
- 938 Hamm MO, Moss BL, Leydon AR, Gala HP, Lanctot A, Ramos R, Klaeser H, Lemmex AC,  
939 Zahler ML, Nemhauser JL, Wright RC. 2019. Accelerating structure-function mapping  
940 using the ViVa webtool to mine natural variation. *Plant Direct* **3**:e00147.  
941 doi:10.1002/pld3.147
- 942 Haruki H, Nishikawa J, Laemmli UK. 2008. The anchor-away technique: rapid, conditional  
943 establishment of yeast mutant phenotypes. *Mol Cell* **31**:925–932.  
944 doi:10.1016/j.molcel.2008.07.020
- 945 Havens KA, Guseman JM, Jang SS, Pierre-Jerome E, Bolten N, Klavins E, Nemhauser JL.  
946 2012. A synthetic approach reveals extensive tunability of auxin signaling. *Plant Physiol*  
947 **160**:135–142. doi:10.1104/pp.112.202184
- 948 Hiratsu K, Matsui K, Koyama T, Ohme-Takagi M. 2003. Dominant repression of target genes by  
949 chimeric repressors that include the EAR motif, a repression domain, in Arabidopsis.  
950 *Plant J* **34**:733–739. doi:10.1046/j.1365-313X.2003.01759.x
- 951 Ito J, Fukaki H, Onoda M, Li L, Li C, Tasaka M, Furutani M. 2016. Auxin-dependent  
952 compositional change in Mediator in ARF7- and ARF19-mediated transcription. *Proc*  
953 *Natl Acad Sci U S A* **113**:6562–6567. doi:10.1073/pnas.1600739113
- 954 Kagale S, Links MG, Rozwadowski K. 2010. Genome-wide analysis of ethylene-responsive  
955 element binding factor-associated amphiphilic repression motif-containing transcriptional  
956 regulators in Arabidopsis. *Plant Physiol* **152**:1109–1134. doi:10.1104/pp.109.151704
- 957 Kaul A, Schuster E, Jennings BH. 2014. The Groucho co-repressor is primarily recruited to local  
958 target sites in active chromatin to attenuate transcription. *PLoS Genet* **10**:e1004595.  
959 doi:10.1371/journal.pgen.1004595
- 960 Ke J, Ma H, Gu X, Thelen A, Brunzelle JS, Li J, Xu HE, Melcher K. 2015. Structural basis for  
961 recognition of diverse transcriptional repressors by the TOPLESS family of corepressors.  
962 *Sci Adv* **1**:e1500107. doi:10.1126/sciadv.1500107
- 963 Khakhar A, Leydon AR, Lemmex AC, Klavins E, Nemhauser JL. 2018. Synthetic hormone-  
964 responsive transcription factors can monitor and re-program plant development. *eLife* **7**.  
965 doi:10.7554/eLife.34702
- 966 Kim MH, Cooper DR, Oleksy A, Devedjiev Y, Derewenda U, Reiner O, Otlewski J, Derewenda  
967 ZS. 2004. The Structure of the N-Terminal Domain of the Product of the Lissencephaly

- 968 Gene Lis1 and Its Functional Implications. *Structure* **12**:987–998.  
969 doi:10.1016/j.str.2004.03.024
- 970 Kim YJ, Björklund S, Li Y, Sayre MH, Kornberg RD. 1994. A multiprotein mediator of  
971 transcriptional activation and its interaction with the C-terminal repeat domain of RNA  
972 polymerase II. *Cell* **77**:599–608. doi:10.1016/0092-8674(94)90221-6
- 973 Krogan NT, Hogan K, Long JA. 2012. APETALA2 negatively regulates multiple floral organ  
974 identity genes in Arabidopsis by recruiting the co-repressor TOPLESS and the histone  
975 deacetylase HDA19. *Dev Camb Engl* **139**:4180–4190. doi:10.1242/dev.085407
- 976 Kumar KRR, Blomberg J, Björklund S. 2018. The MED7 subunit paralogs of Mediator function  
977 redundantly in development of etiolated seedlings in Arabidopsis. *Plant J* **96**:578–594.  
978 doi:10.1111/tpj.14052
- 979 Laplaze L, Parizot B, Baker A, Ricaud L, Martinière A, Auguy F, Franche C, Nussaume L,  
980 Bogusz D, Haseloff J. 2005. GAL4-GFP enhancer trap lines for genetic manipulation of  
981 lateral root development in Arabidopsis thaliana. *J Exp Bot* **56**:2433–2442.  
982 doi:10.1093/jxb/eri236
- 983 Lee JE, Golz JF. 2012. Diverse roles of Groucho/Tup1 co-repressors in plant growth and  
984 development. *Plant Signal Behav* **7**:86–92. doi:10.4161/psb.7.1.18377
- 985 Lee M, Chatterjee S, Struhl K. 2000. Genetic analysis of the role of Pol II holoenzyme  
986 components in repression by the Cyc8-Tup1 corepressor in yeast. *Genetics* **155**:1535–  
987 1542.
- 988 Liu X, Galli M, Camehl I, Gallavotti A. 2019. RAMOSA1 ENHANCER LOCUS2-Mediated  
989 Transcriptional Repression Regulates Vegetative and Reproductive Architecture. *Plant*  
990 *Physiol* **179**:348–363. doi:10.1104/pp.18.00913
- 991 Liu Z, Karmarkar V. 2008. Groucho/Tup1 family co-repressors in plant development. *Trends*  
992 *Plant Sci* **13**:137–144. doi:10.1016/j.tplants.2007.12.005
- 993 Long JA, Ohno C, Smith ZR, Meyerowitz EM. 2006. TOPLESS regulates apical embryonic fate  
994 in Arabidopsis. *Science* **312**:1520–1523. doi:10.1126/science.1123841
- 995 Ma H, Duan J, Ke J, He Y, Gu X, Xu T-H, Yu H, Wang Y, Brunzelle JS, Jiang Y, Rothbart SB,  
996 Xu HE, Li J, Melcher K. 2017. A D53 repression motif induces oligomerization of  
997 TOPLESS corepressors and promotes assembly of a corepressor-nucleosome complex.  
998 *Sci Adv* **3**:e1601217. doi:10.1126/sciadv.1601217
- 999 Maji S, Dahiya P, Waseem M, Dwivedi N, Bhat DS, Dar TH, Thakur JK. 2019. Interaction map  
1000 of Arabidopsis Mediator complex expounding its topology. *Nucleic Acids Res* **47**:3904–  
1001 3920. doi:10.1093/nar/gkz122
- 1002 Malik N, Agarwal P, Tyagi A. 2017. Emerging functions of multi-protein complex Mediator with  
1003 special emphasis on plants. *Crit Rev Biochem Mol Biol* **52**:475–502.  
1004 doi:10.1080/10409238.2017.1325830
- 1005 Martin-Arevalillo R, Nanao MH, Larrieu A, Vinos-Poyo T, Mast D, Galvan-Ampudia C, Brunoud  
1006 G, Vernoux T, Dumas R, Parcy F. 2017. Structure of the Arabidopsis TOPLESS  
1007 corepressor provides insight into the evolution of transcriptional repression. *Proc Natl*  
1008 *Acad Sci U S A*. doi:10.1073/pnas.1703054114
- 1009 Martin-Arevalillo R, Thévenon E, Jégu F, Vinos-Poyo T, Vernoux T, Parcy F, Dumas R. 2019.  
1010 Evolution of the Auxin Response Factors from charophyte ancestors. *PLoS Genet*  
1011 **15**:e1008400. doi:10.1371/journal.pgen.1008400
- 1012 Matsumura H, Kusaka N, Nakamura T, Tanaka N, Sagegami K, Uegaki K, Inoue T, Mukai Y.  
1013 2012. Crystal structure of the N-terminal domain of the yeast general corepressor Tup1p  
1014 and its functional implications. *J Biol Chem* **287**:26528–26538.  
1015 doi:10.1074/jbc.M112.369652
- 1016 Mayer KS, Chen X, Sanders D, Chen J, Jiang J, Nguyen P, Scalf M, Smith LM, Zhong X. 2019.  
1017 HDA9-PWR-HOS15 Is a Core Histone Deacetylase Complex Regulating Transcription  
1018 and Development. *Plant Physiol* **180**:342–355. doi:10.1104/pp.18.01156



- 1019 Mclsaac RS, Oakes BL, Wang X, Dummit KA, Botstein D, Noyes MB. 2013. Synthetic gene  
1020 expression perturbation systems with rapid, tunable, single-gene specificity in yeast.  
1021 *Nucleic Acids Res* **41**:e57. doi:10.1093/nar/gks1313
- 1022 Mitchell LA, Chuang J, Agmon N, Khunsriraksakul C, Phillips NA, Cai Y, Truong DM,  
1023 Veerakumar A, Wang Y, Mayorga M, Blomquist P, Sadda P, Trueheart J, Boeke JD.  
1024 2015. Versatile genetic assembly system (VEGAS) to assemble pathways for expression  
1025 in *S. cerevisiae*. *Nucleic Acids Res* **43**:6620–6630. doi:10.1093/nar/gkv466
- 1026 Mottis A, Mouchiroud L, Auwerx J. 2013. Emerging roles of the corepressors NCoR1 and SMRT  
1027 in homeostasis. *Genes Dev* **27**:819–835. doi:10.1101/gad.214023.113
- 1028 Oberoi J, Fairall L, Watson PJ, Yang J-C, Czimmerer Z, Kampmann T, Goult BT, Greenwood  
1029 JA, Gooch JT, Kallenberger BC, Nagy L, Neuhaus D, Schwabe JWR. 2011. Structural  
1030 basis for the assembly of the SMRT/NCoR core transcriptional repression machinery.  
1031 *Nat Struct Mol Biol* **18**:177–184. doi:10.1038/nsmb.1983
- 1032 Papamichos-Chronakis M, Conlan RS, Gounalaki N, Copf T, Tzamarias D. 2000. Hrs1/Med3 is  
1033 a Cyc8-Tup1 corepressor target in the RNA polymerase II holoenzyme. *J Biol Chem*  
1034 **275**:8397–8403. doi:10.1074/jbc.275.12.8397
- 1035 Perissi V, Jepsen K, Glass CK, Rosenfeld MG. 2010. Deconstructing repression: evolving  
1036 models of co-repressor action. *Nat Rev Genet* **11**:109–123. doi:10.1038/nrg2736
- 1037 Petrenko N, Jin Y, Wong KH, Struhl K. 2017. Evidence that Mediator is essential for Pol II  
1038 transcription, but is not a required component of the preinitiation complex in vivo. *eLife*  
1039 **6**:e28447. doi:10.7554/eLife.28447
- 1040 Pierre-Jerome E, Jang SS, Havens KA, Nemhauser JL, Klavins E. 2014. Recapitulation of the  
1041 forward nuclear auxin response pathway in yeast. *Proc Natl Acad Sci U S A* **111**:9407–  
1042 9412. doi:10.1073/pnas.1324147111
- 1043 Pierre-Jerome E, Wright RC, Nemhauser JL. 2017. Characterizing Auxin Response Circuits in  
1044 *Saccharomyces cerevisiae* by Flow Cytometry. *Methods Mol Biol Clifton NJ* **1497**:271–  
1045 281. doi:10.1007/978-1-4939-6469-7\_22
- 1046 Raya-González J, Oropeza-Aburto A, López-Bucio JS, Guevara-García AA, de Veylder L,  
1047 López-Bucio J, Herrera-Estrella L. 2018. MEDIATOR18 influences Arabidopsis root  
1048 architecture, represses auxin signaling and is a critical factor for cell viability in root  
1049 meristems. *Plant J Cell Mol Biol* **96**:895–909. doi:10.1111/tpj.14114
- 1050 Raya-González J, Ortiz-Castro R, Ruíz-Herrera LF, Kazan K, López-Bucio J. 2014.  
1051 PHYTOCHROME AND FLOWERING TIME1/MEDIATOR25 Regulates Lateral Root  
1052 Formation via Auxin Signaling in Arabidopsis. *Plant Physiol* **165**:880–894.  
1053 doi:10.1104/pp.114.239806
- 1054 Samanta S, Thakur JK. 2015. Importance of Mediator complex in the regulation and integration  
1055 of diverse signaling pathways in plants. *Front Plant Sci* **6**:757.  
1056 doi:10.3389/fpls.2015.00757
- 1057 Sato S, Tomomori-Sato C, Tsai K-L, Yu X, Sardu M, Saraf A, Washburn MP, Florens L,  
1058 Asturias FJ, Conaway RC, Conaway JW. 2016. Role for the MED21-MED7 Hinge in  
1059 Assembly of the Mediator-RNA Polymerase II Holoenzyme. *J Biol Chem* **291**:26886–  
1060 26898. doi:10.1074/jbc.M116.756098
- 1061 Schreiber-Agus N, Chin L, Chen K, Torres R, Rao G, Guida P, Skoultchi AI, DePinho RA. 1995.  
1062 An amino-terminal domain of Mxi1 mediates anti-Myc oncogenic activity and interacts  
1063 with a homolog of the yeast transcriptional repressor SIN3. *Cell* **80**:777–786.
- 1064 Schuster-Böckler B, Schultz J, Rahmann S. 2004. HMM Logos for visualization of protein  
1065 families. *BMC Bioinformatics* **5**:7. doi:10.1186/1471-2105-5-7
- 1066 Siligato R, Wang X, Yadav SR, Lehesranta S, Ma G, Ursache R, Sevilem I, Zhang J, Gorte M,  
1067 Prasad K, Wrzaczek M, Heidstra R, Murphy A, Scheres B, Mähönen AP. 2016. MultiSite  
1068 Gateway-Compatible Cell Type-Specific Gene-Inducible System for Plants. *Plant Physiol*  
1069 **170**:627–641. doi:10.1104/pp.15.01246

- 1070 Sood V, Cajigas I, D'Urso A, Light WH, Brickner JH. 2017. Epigenetic Transcriptional Memory of  
1071 GAL Genes Depends on Growth in Glucose and the Tup1 Transcription Factor in  
1072 *Saccharomyces cerevisiae*. *Genetics* **206**:1895–1907. doi:10.1534/genetics.117.201632  
1073 Ulmasov T, Hagen G, Guilfoyle TJ. 1997. ARF1, a transcription factor that binds to auxin  
1074 response elements. *Science* **276**:1865–1868. doi:10.1126/science.276.5320.1865  
1075 Weber E, Engler C, Gruetzner R, Werner S, Marillonnet S. 2011. A Modular Cloning System for  
1076 Standardized Assembly of Multigene Constructs. *PLOS ONE* **6**:e16765.  
1077 doi:10.1371/journal.pone.0016765  
1078 Wong KH, Struhl K. 2011. The Cyc8-Tup1 complex inhibits transcription primarily by masking  
1079 the activation domain of the recruiting protein. *Genes Dev* **25**:2525–2539.  
1080 doi:10.1101/gad.179275.111  
1081 Wong MM, Guo C, Zhang J. 2014. Nuclear receptor corepressor complexes in cancer:  
1082 mechanism, function and regulation. *Am J Clin Exp Urol* **2**:169–187.  
1083 Wright RC, Boltan N, Pierre-Jerome E. 2019. flowTime: Annotation and analysis of biological  
1084 dynamical systems using flow cytometry. Bioconductor version: Release (3.10).  
1085 doi:10.18129/B9.bioc.flowTime  
1086 Yang Y, Li R, Qi M. 2000. In vivo analysis of plant promoters and transcription factors by  
1087 agroinfiltration of tobacco leaves. *Plant J* **22**:543–551. doi:10.1046/j.1365-  
1088 313x.2000.00760.x  
1089 Zhang Y, Gao S, Wang Z. 2010. Structural and functional analysis of amino-terminal enhancer  
1090 of split in androgen-receptor-driven transcription. *Biochem J* **427**:499–511.  
1091 doi:10.1042/BJ20091631  
1092 Zhang Z, Reese JC. 2004. Redundant Mechanisms Are Used by Ssn6-Tup1 in Repressing  
1093 Chromosomal Gene Transcription in *Saccharomyces cerevisiae*. *J Biol Chem*  
1094 **279**:39240–39250. doi:10.1074/jbc.M407159200  
1095 Zhu J, Jeong JC, Zhu Y, Sokolchik I, Miyazaki S, Zhu J-K, Hasegawa PM, Bohnert HJ, Shi H,  
1096 Yun D-J, Bressan RA. 2008. Involvement of Arabidopsis HOS15 in histone deacetylation  
1097 and cold tolerance. *Proc Natl Acad Sci* **105**:4945–4950. doi:10.1073/pnas.0801029105  
1098 Zhu J, Liu M, Liu X, Dong Z. 2018. RNA polymerase II activity revealed by GRO-seq and pNET-  
1099 seq in Arabidopsis. *Nat Plants* **4**:1112–1123. doi:10.1038/s41477-018-0280-0  
1100

1101 **Supplemental Figures**

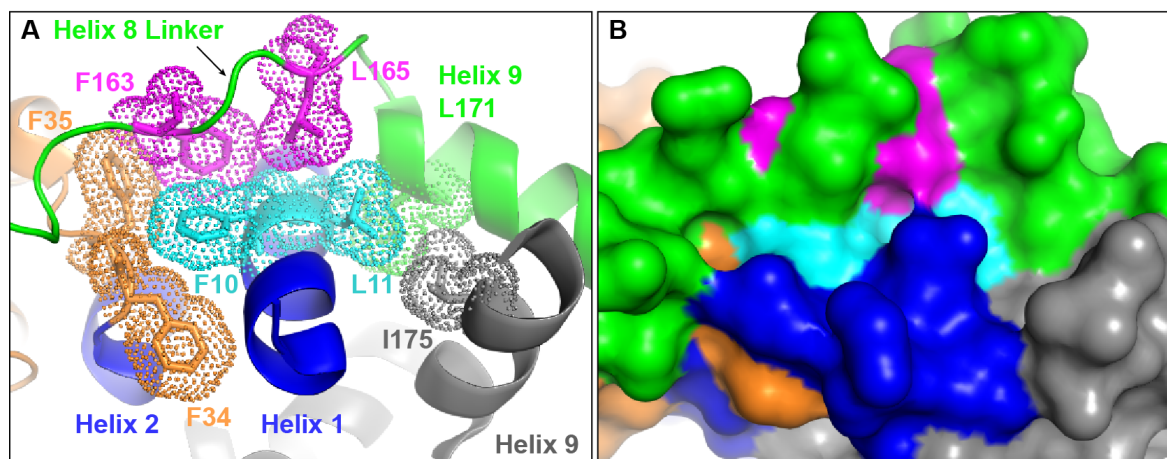

1102 **C**

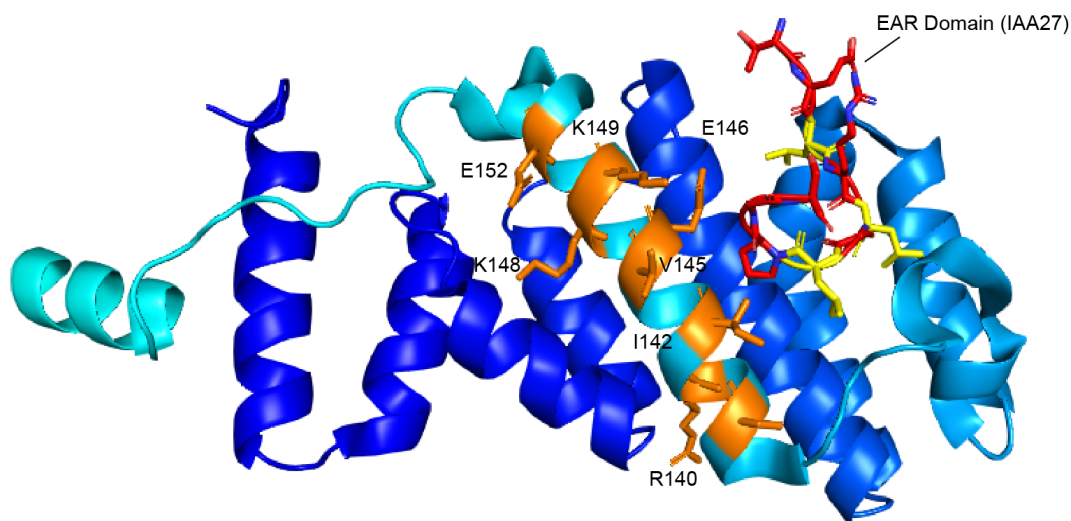

1102  
1103 **Figure 2 – Figure Supplement 1. A.** The position of the hydrophobic residues in helix  
1104 one that allow confer auxin sensitivity to the *AtARC<sup>Sc</sup>*. In the context of the full-length N-  
1105 terminus of TPL, F10 and its hydrophobic neighbor L11 sit underneath the linker that  
1106 connects Helix 8 to Helix 9, interacting with inward-facing hydrophobic residues F163  
1107 and L165. Further stabilization of F10 likely comes from F34 and F35 in the CTLH  
1108 domain, while L11 is likely stabilized by L171 from Intra-Helix 9 interactions, and I175  
1109 from inter-Helix 9 interactions. **B.** The surface rendering of this region helps visualize  
1110 the buried nature of these residues in the full-length structure. The second monomer of  
1111 TPL bound at the LisH-Helix 9 interface is colored gray. **C.** MED21 binding and EAR  
1112 motif binding utilize an overlapping interaction interface. One Monomer of TPL is shown  
1113 in a gradient of Blue, with the EAR motif of AtIAA27 (red) bound in the groove created  
1114 by helices 5-8, with the conserved Lysines (LxLxL – yellow). The amino acids mutated  
1115 in helix 8 that affect repression and MED21 binding are colored in gold. PDB 5NQV.  
1116

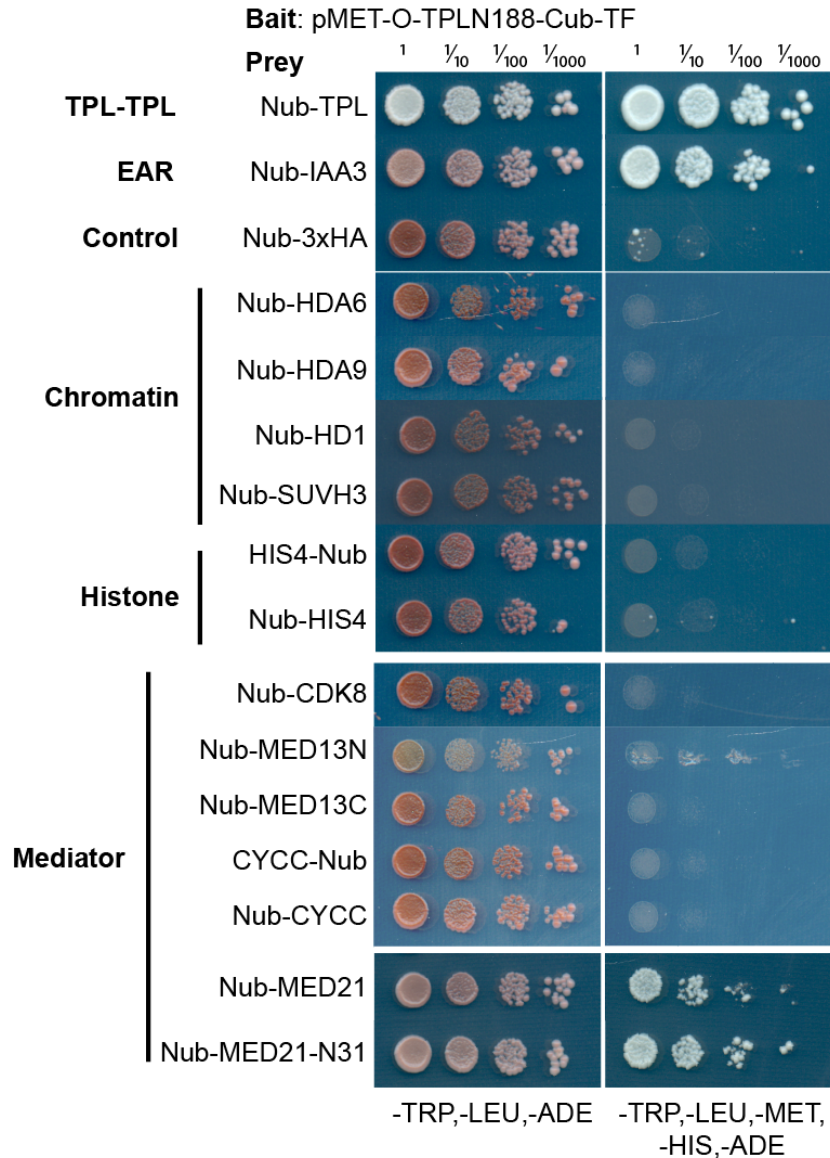

1117  
 1118 **Figure 3 – Figure Supplement 1. TPL-N terminal domain (TPLN188) interacts with**  
 1119 **the N-terminus of AtMED21.** Identifying TPL-N terminal domain interactor proteins  
 1120 through cytoplasmic split ubiquitin protein interaction assay. We tested the N-terminal  
 1121 and C-terminal portions of MED13 separately and divided the coding sequence at  
 1122 amino acid 967 (MED13N = aa1-967, MED13C = aa968-1908). Each bait tested is the  
 1123 *Arabidopsis* homolog cloned from cDNA from the Col-0 accession, with the exception of  
 1124 MED13, which was synthesized via Twist (<https://www.twistbioscience.com/>).  
 1125 Interaction of bait and prey proteins reconstitute split ubiquitin, release a synthetic  
 1126 transcription factor that allows growth on media lacking Histidine and Adenine. The  
 1127 relative position of the N-terminal portion of ubiquitin (Nub) is indicated for each bait  
 1128 protein. Plates were scanned at 3 days after plating to allow weaker interactions to  
 1129 develop if they were present.



1133 Two different exposure times are shown to demonstrate the lower abundance of the  
1134 truncation with only the first 31 amino acids of the AtMED21 (N31). Asterisks indicate  
1135 the size predicted for the indicated protein. **B.** Protein alignment of selected MED21  
1136 homologs from various species. Dr - *Drosophila melanogaster*, Tr - *Takifugu rubripes*,  
1137 Ms - *Mus musculus*, Gg - *Gallus gallus*, Hs - *Homo sapiens*, Sp - *Strongylocentrotus*  
1138 *purpuratus*, Sc - *Saccharomyces cerevisiae*, At - *Arabidopsis thaliana*, Os - *Oryza*  
1139 *sativa*, Sm - *Selaginella moellendorffii*, Pp - *Physcomitrella patens*. Alignment was  
1140 performed in CLC sequence viewer 7, using a neighbor joining method. **C-D.** Structure  
1141 of the MED21 (Cyan) & MED7 (Blue) hetero dimer, adapted from 1YKH, (Baumli et al.,  
1142 2005). The amino acids in the N-terminus that were solved are highlighted in red up to  
1143 the 7th amino acid of the yeast MED21. **C.** The cartoon visualization, **D.** Surface  
1144 visualization. **E.** Core mediator (5N9J, (Nozawa et al., 2017)) with the location of  
1145 MED21 and MED7 indicated with the same colors from (C-D). In this structure the  
1146 location of the MED21 N-terminus is again indicated in red, demonstrating its close  
1147 proximity to the Knob region (dotted circle).  
1148  
1149

1150

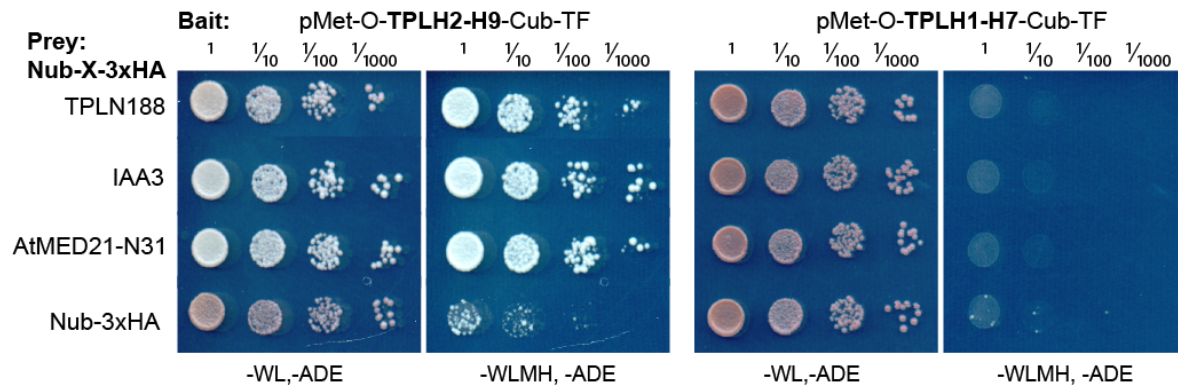

1151

1152

1153

1154

1155

1156

1157

1158

1159

1160

1161

1162

1163

1164

1165

**Figure 3 – Figure Supplement 3. TPL interacts with MED21 through an interaction within helices 8-9.** Identifying TPL-N terminal domain interactor proteins through cytoplasmic split ubiquitin protein interaction assay. Interaction of bait and prey proteins reconstitute split ubiquitin, release a synthetic transcription factor that allows growth on media lacking Histidine and Adenine. The relative position of the N-terminal portion of ubiquitin (Nub) is indicated for each bait protein. Plates were scanned at 2 days after plating.

1166

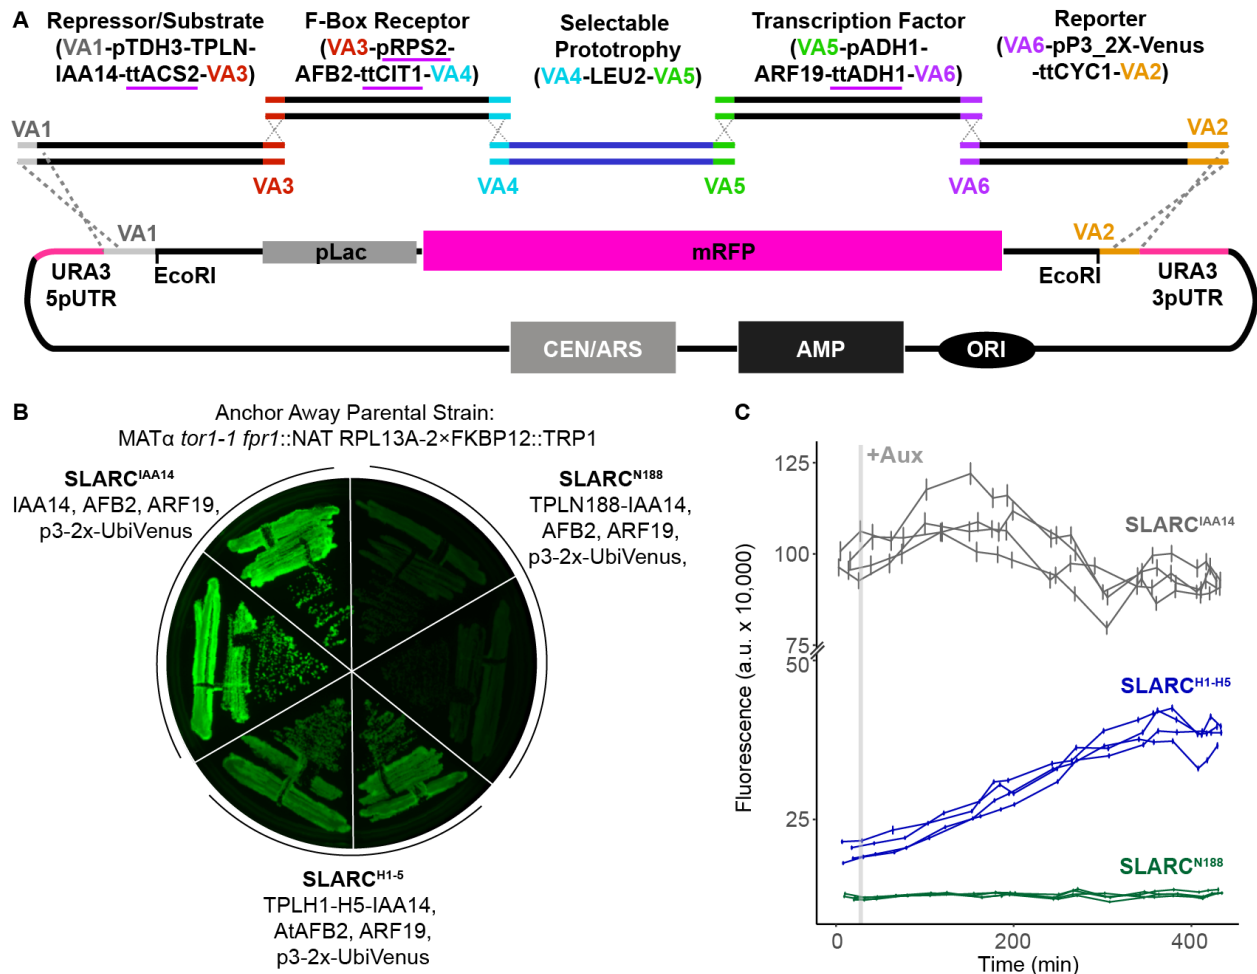

1167

1168

1169

1170

1171

1172

1173

1174

1175

1176

1177

1178

1179

1180

1181

1182

1183

**Figure 4 – Figure Supplement 1. Construction and characterization of the Single Locus Auxin Response Circuit (SLARC).** **A.** Design schematic of the approach utilized to create the SLARC through a VEGAS assembly approach. Each individual transcriptional unit (TU) was checked to replace promoters or terminators that utilized identical sequences and replaced with an alternative sequence indicated by a purple underline. These TUs were assembled into level 1 plasmids by Golden Gate reaction. Subsequently, they were amplified by PCR using primers specific for the Vegas Adaptor (VA) sequences specific for their TU cassette. In example, for the first Repressor/Substrate TU the TU was amplified using primers for VA1 and VA3 and purified by a PCR cleanup column (NEB). The acceptor plasmid was cut with EcoRI and both TU and acceptor plasmid was transformed into yeast and recombinant plasmids were selected on synthetic drop out (SDO) plates lacking Leucine. **B.** Primary SLARC transformants were struck out onto fresh SDO -Leu and imaged for Venus expression, demonstrating varying levels of reporter expression that correlate with TPL repressor domains. Plasmid DNA was purified from these strains and sequenced to confirm the proper recombination of TU cassettes. **C.** Time course flow cytometry of SLARC strains



1184 following auxin addition. For all cytometry experiments, the indicated TPL construct is  
1185 fused to IAA14, because this IAA performs better in haploid yeast strains than IAA3.  
1186 Every point represents the average fluorescence of 5-10,000 individually measured  
1187 yeast cells (a.u. - arbitrary units). Auxin (IAA-10 $\mu$ M) was added at the indicated time  
1188 (gray bar, + Aux). Four independent experiments are shown for each construct.  
1189  
1190

1191  
1192

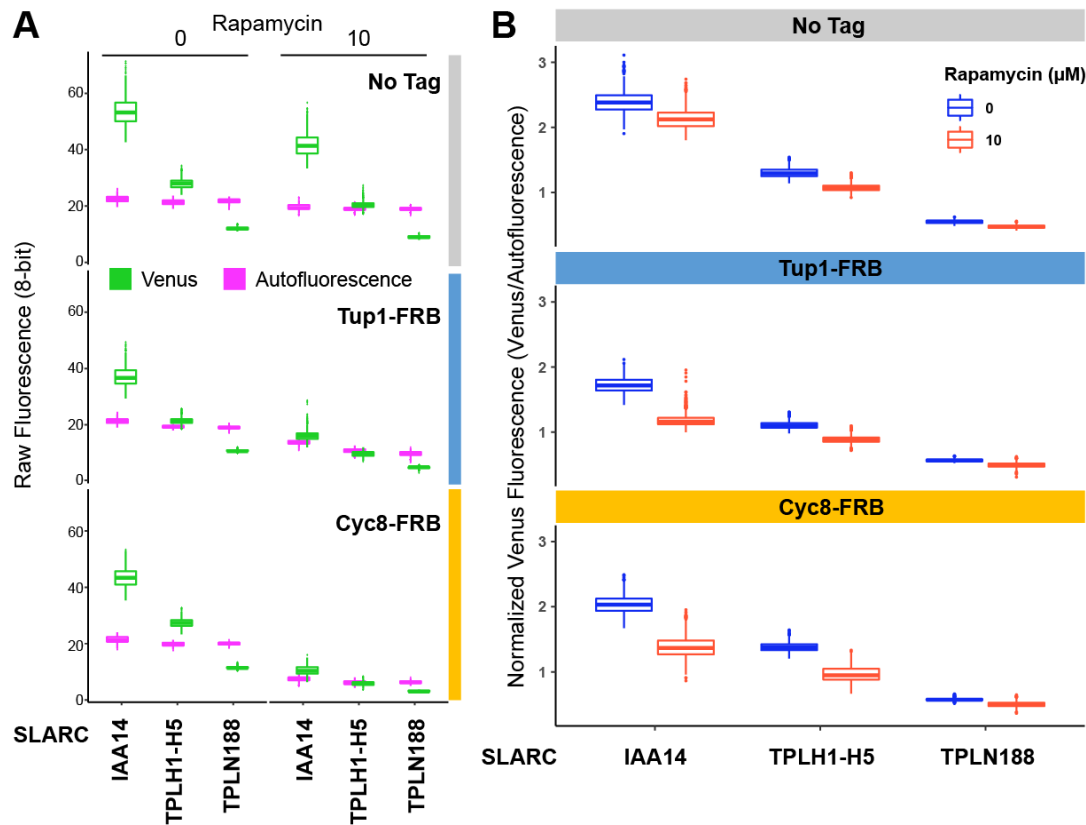

1193  
1194  
1195  
1196  
1197  
1198  
1199  
1200  
1201  
1202  
1203  
1204  
1205  
1206  
1207  
1208  
1209  
1210  
1211  
1212

**Figure 4 – Figure Supplement 2. The yeast TPL homolog Tup1 and its partner protein do not repress the SLARC.** **A.** Quantified fluorescence from the single locus auxin response circuit (SLARC) introduced into Tup1 and Cyc8 anchor away lines demonstrates no increased fluorescence from the reporter upon depletion of Tup1 or Cyc8 from the nucleus. Data is presented as boxplots, with the Venus reporter in green and the red background (autofluorescence) of the cells plotted in magenta. **B.** Anchor away depletion of Tup1 or Cyc8 results in slower yeast growth. To normalize for this disparity in growth, Venus fluorescence from (**A**) was normalized to red autofluorescence, where each pixel was normalized to the corresponding red autofluorescence collected for that position and plotted as a boxplot. Two individual biological replicates (two separate experiments) were evaluated, and the data was pooled. No increase of reporter signal was detected upon treatment with Rapamycin, indicating that TPL repression does not require either Tup1 or Cyc8 proteins.

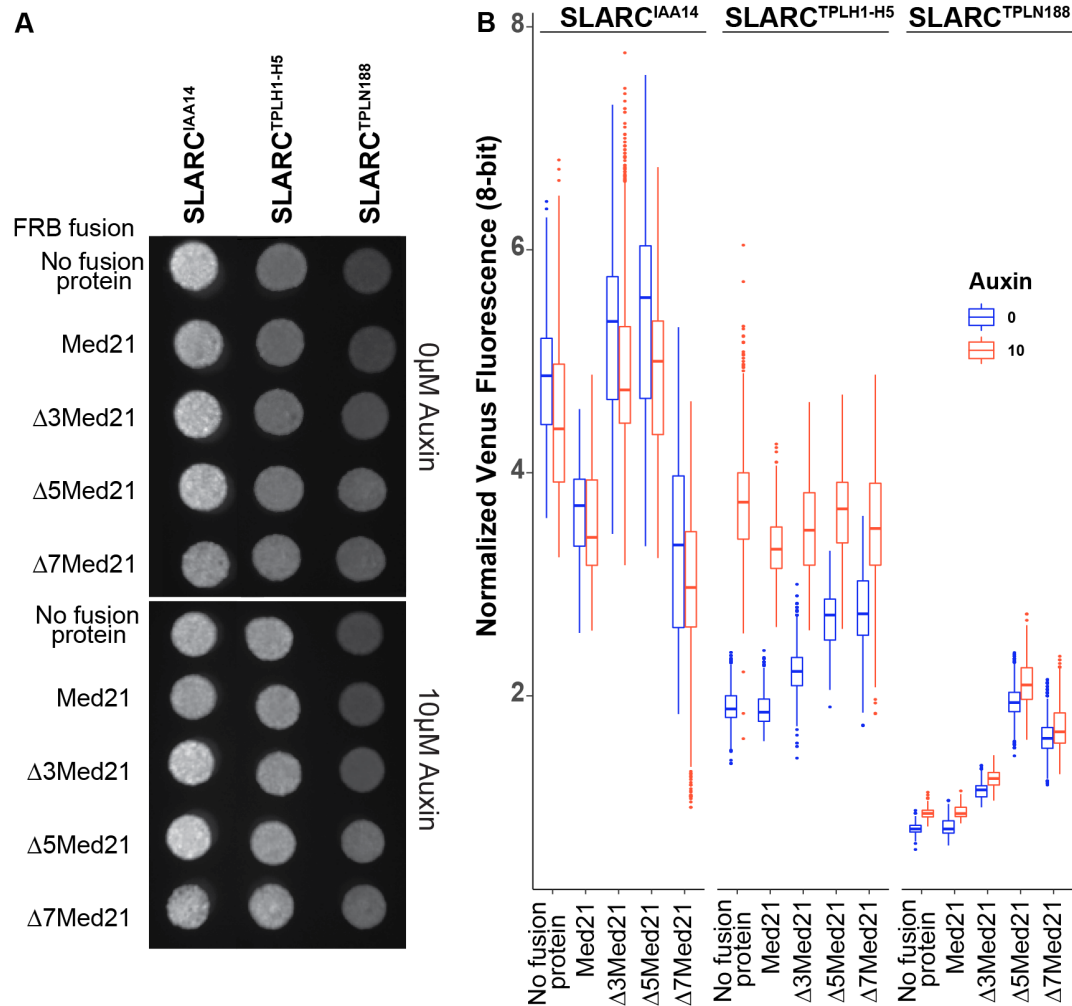

1213  
1214  
1215  
1216  
1217  
1218  
1219  
1220  
1221  
1222  
1223

**Figure 4 – Figure Supplement 3. MED21 N terminal deletions are viable in *Saccharomyces* and demonstrate altered SLARC transcriptional states. A.** A representative grayscale image of fellow fluorescence of spot plates of yeast strains carrying SLARC plasmids in MED21 N-terminal deletions. Each is plated at an OD600 of 0.1 on SDO with or without auxin (10µM IAA). **B.** Venus fluorescence from (A) was normalized to red background (autofluorescence), where each pixel was normalized to the corresponding red autofluorescence collected for that position and plotted as a boxplot. Two individual biological replicates (two separate experiments) were evaluated, and the data was pooled and is presented as boxplots.

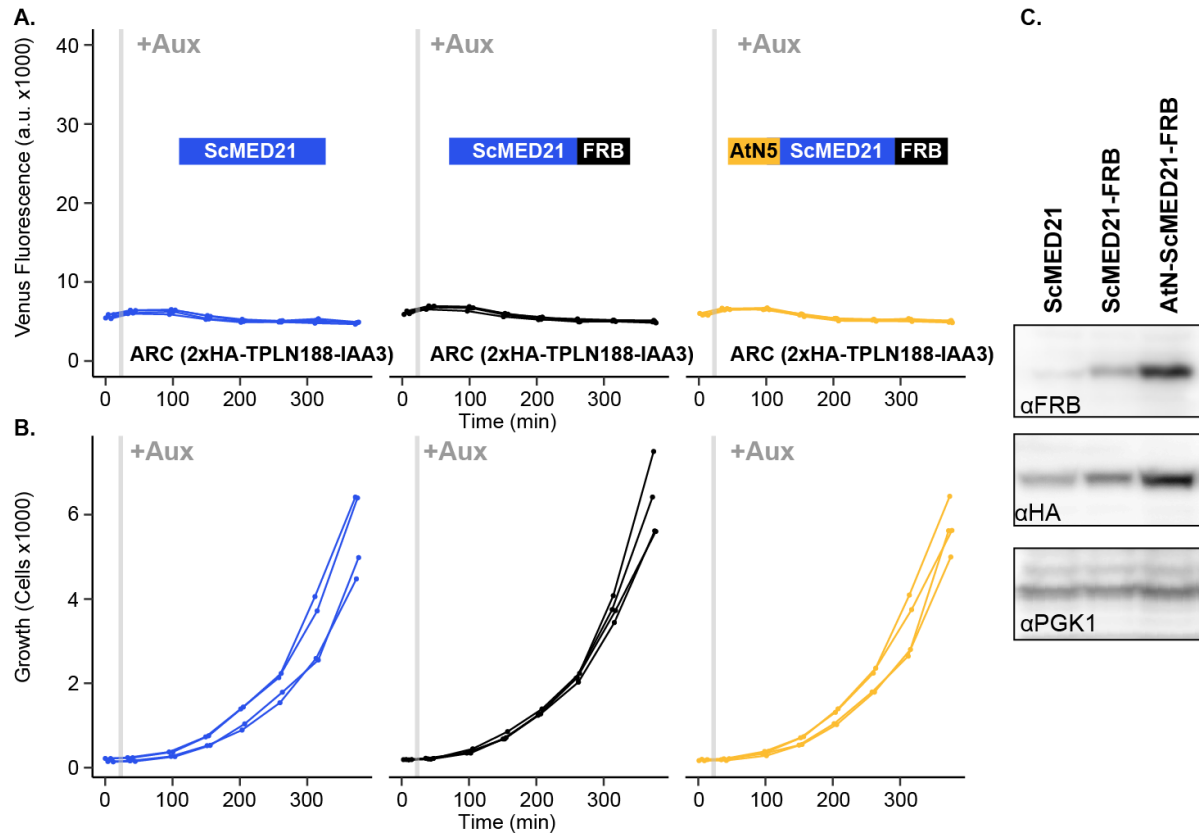

1224  
1225  
1226  
1227  
1228  
1229  
1230  
1231  
1232  
1233  
1234  
1235  
1236  
1237  
1238

**Figure 4 – Figure Supplement 4. A. Conversion of the first five amino acids of ScMED21 to the corresponding sequence from AtMED21 results in an identical repression profile.** Time course flow cytometry of SLARC strains following auxin addition. For all cytometry experiments, the indicated TPL construct is fused to IAA14, because this IAA performs better in haploid yeast strains than IAA3. Every point represents the average fluorescence of 5-10,000 individually measured yeast cells (a.u. - arbitrary units). Auxin (IAA-10 $\mu$ M) was added at the indicated time (gray bar, + Aux). Two independent experiments are shown for each construct. **B.** Cell growth of the strains in **(A)** indicate the swap of the N-terminal region had no effect on yeast growth or viability. Data presented is events per microliter over the time-course of the cytometry experiments. **C.** Protein expression analysis by western blotting of strains used in **A** & **B**. In this ARC, TPLN188-IAA3 is N-terminally fused to 2xHA. Total protein loading levels were tested by blotting against the housekeeping gene PGK1 (bottom panel).

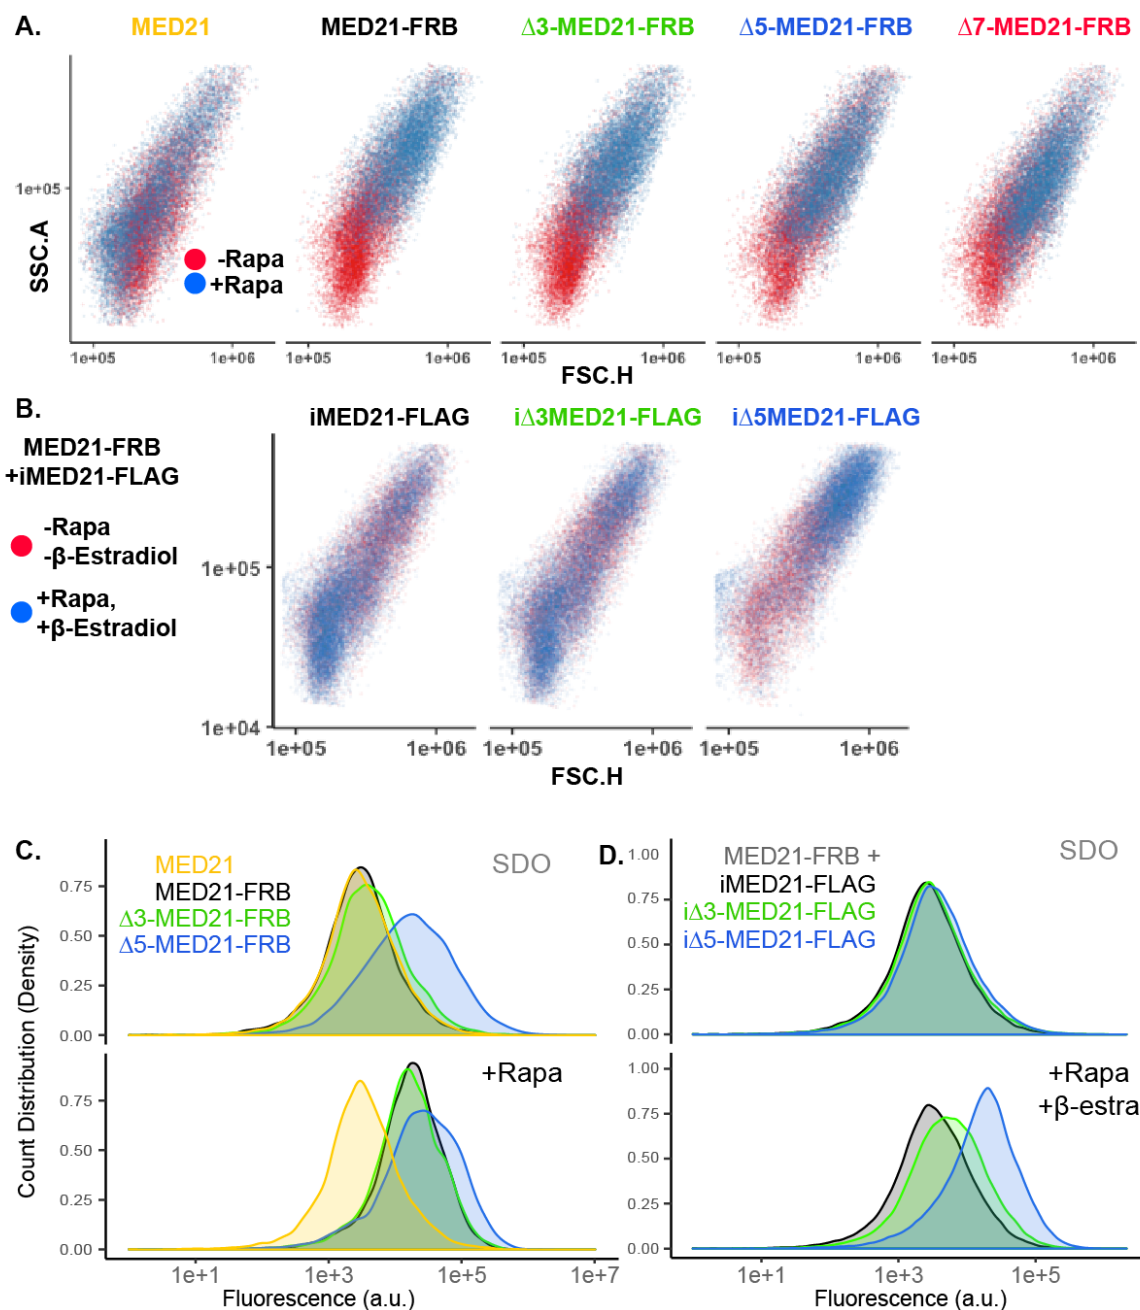

1239

1240

1241

1242

1243

1244

1245

1246

1247

1248

**Figure 4 – Figure Supplement 5. Inducible MED21 rescues rapamycin induced yeast growth defects.** **A.** Depletion of nuclear ScMed21 by Rapamycin increased cell size even in short time-courses, consistent with its essential role in many core pathways. Scatterplots of side scatter area by forward scatter height (SSC.A x FSC.H) indicate large scale increases in cell size in populations of yeast with (blue) or without (red) Rapamycin treatment. **B.** Inducible MED21 (iMed21) wild type and variants cell size were examined before (red) and after (blue) treatment with Rapamycin and  $\beta$ -estradiol to simultaneously deplete the wild-type ScMed21-FRB fusion, and induce the transcription of the MED21 variant. Scatterplots of side scatter area by forward scatter

1249 height (SSC.A x FSC.H) demonstrate a less disrupted cell size compared to Anchor  
1250 Away strains in **(A)**. **C-D**. Histograms of Venus fluorescence in inducible MED21  
1251 (iMed21) strains demonstrate that populations were evenly distributed around a single  
1252 mean, suggesting we were observing the immediate effects of the MED21 deletions.  
1253 The histograms were built using ggplots Density function to create a visualization of  
1254 count distribution. These samples were tested at 300 minutes (as in Figure 4D), and  
1255 plotted to visualize cells at the equivalent stage of growth, MED21 depletion, and  
1256 induction. **C**. Effect of anchor away of ScMed21-FRB variants alone and **D**. Depletion of  
1257 ScMed21-FRB after induction ( $\beta$ -estradiol added 4 hours before Rapamycin treatment)  
1258 of iMed21.  
1259

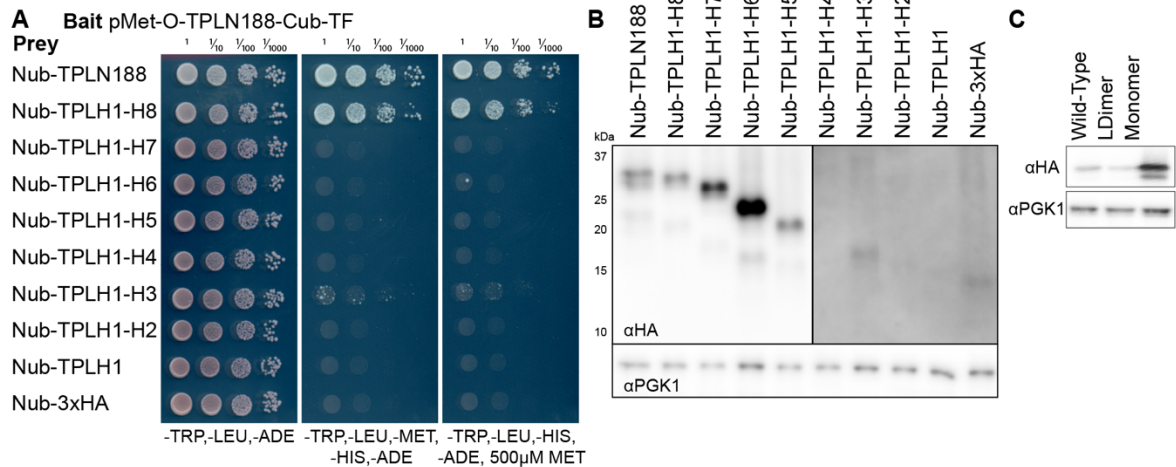

1260  
1261  
1262  
1263  
1264  
1265  
1266  
1267  
1268  
1269  
1270  
1271  
1272  
1273  
1274

**Figure 5 – Figure Supplement 1. A.** Cytoplasmic split ubiquitin interaction (cytoSUS) assay on serial deletions of TPL. Interaction of bait and prey proteins reconstitute split ubiquitin, release a synthetic transcription factor that allows growth on media lacking Histidine and Adenine. The expression level of the bait protein can be repressed through increased Methionine in the media. **B.** Protein levels of Nub-TPL fusions were tested by PAGE and western blotting for the c-terminal 3xHA epitope tag included in all constructs. Deletions longer than H1-4 are detectable at higher levels (left panel), whereas shorter isoforms required longer exposure times to detect (right panel). Total protein loading levels were tested by the housekeeping gene PGK1 (bottom panel). **C.** Protein expression analysis by western blotting of tetramerization mutants expressed in yeast for cytoSUS interaction assay in Figure 5I. Prey constructs are C-terminally fused to 2xHA. Total protein loading levels were tested by blotting against the housekeeping gene PGK1 (bottom panel).

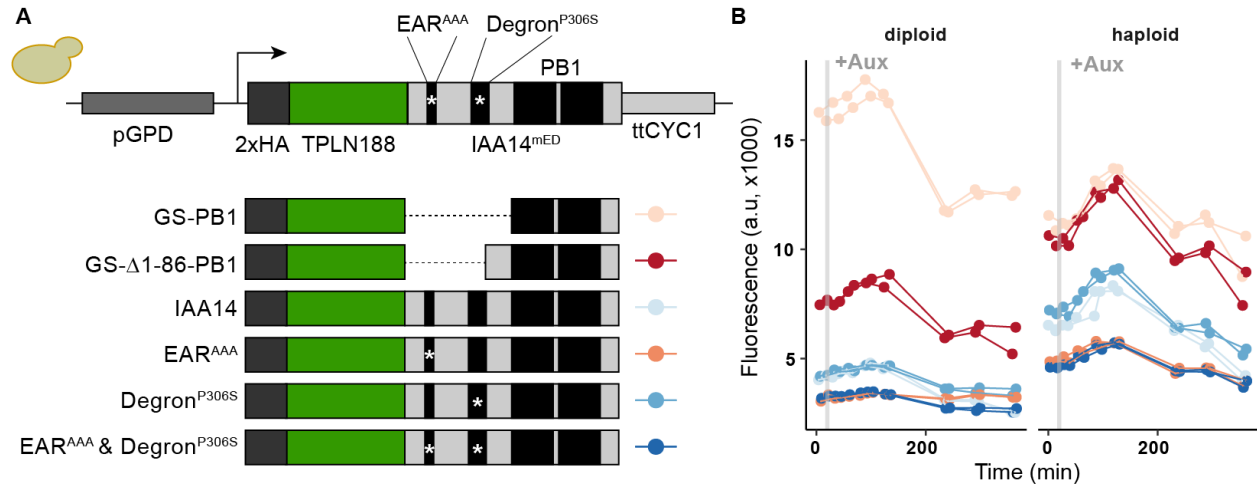

1275  
1276  
1277 **Figure 6 – Figure Supplement 1. Engineering and prototyping a variant of TPLN-**  
1278 **IAA14<sup>mED</sup> which carries mutations in the EAR domain (EAR<sup>AAA</sup>) and in the degron**  
1279 **(P306S) in yeast. A.** Cartoon schematic of the mutations tested during prototyping of  
1280 the TPLN188-IAA14<sup>mED</sup> construct. In each case the identical glycine-serine linker (GS)  
1281 was used as the flexible linker between the 2xHA-TPLN188 protein and the portion of  
1282 IAA14 retained in the construct. **B.** Time course flow cytometry of TPLN-IAA14<sup>mED</sup>  
1283 strains following auxin addition. Strains containing the TPLN-IAA14<sup>mED</sup> was tested in  
1284 both haploid and diploid strains and demonstrated similar repression profiles. Every  
1285 point represents the average fluorescence of 5-10,000 individually measured yeast cells  
1286 (a.u. - arbitrary units). Auxin (IAA-10 $\mu$ M) was added at the indicated time (gray bar, +  
1287 Aux). Two independent experiments are shown for each construct.  
1288



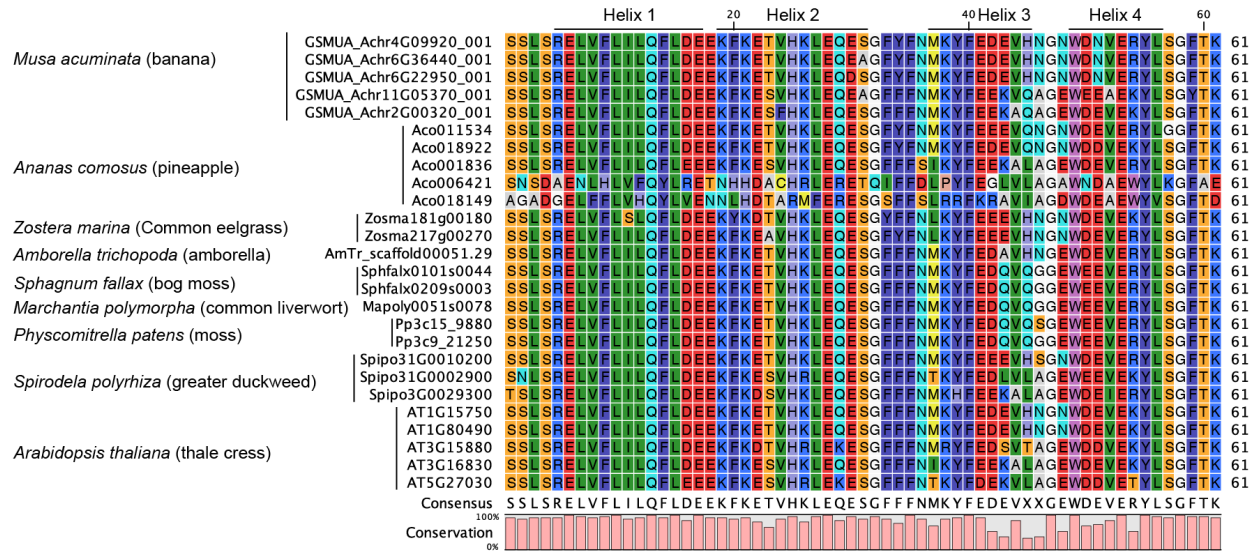

1289  
1290  
1291  
1292  
1293  
1294  
1295  
1296  
1297  
1298

**Figure 6 – Figure supplement 2. Alignment of TPL homologs demonstrates high levels of conservation over the LisH domain (Helix 1 – Helix 2) in the land plant lineage.** Amino acid sequences from Phytozome (<https://phytozome.jgi.doe.gov/>) were identified by homology to TPL and TPR sequences from *Arabidopsis thaliana*. Sequences were aligned using CLC sequence viewer and amino acids are shaded according to the RASMOL color scheme. High levels of conservation can be observed within the LisH domain. Sequences are grouped by species, and the species name is provided on the left.

1299

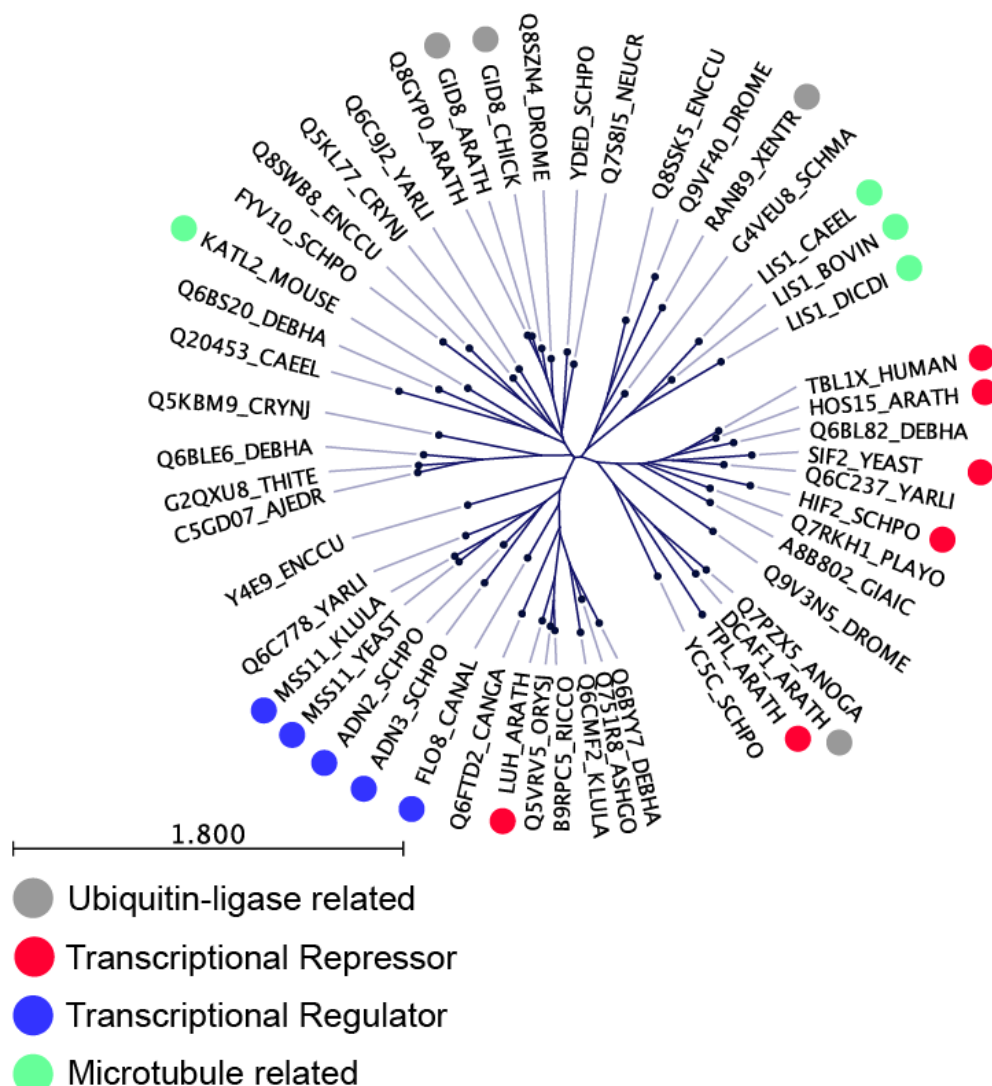

1300  
 1301 **Figure 6 – Figure Supplement 3. Phylogenetic tree of seed LisH domains in the**  
 1302 **PFAM08513 Seed alignment identify a subclade of proteins with defined**  
 1303 **repressor functions.** The TPL LisH domain was added to an alignment of seed  
 1304 sequences for PFAM08513 containing 50 seed sequences (the curated alignment from  
 1305 which the HMM for the family is built). These were aligned using CLC Sequence Viewer  
 1306 7, a tree was constructed using a Neighbor Joining method, and bootstrap analysis  
 1307 performed with 10,000 replicates. Colored circles were added to proteins where  
 1308 functional analysis has yielded functional information about gene function.

1309

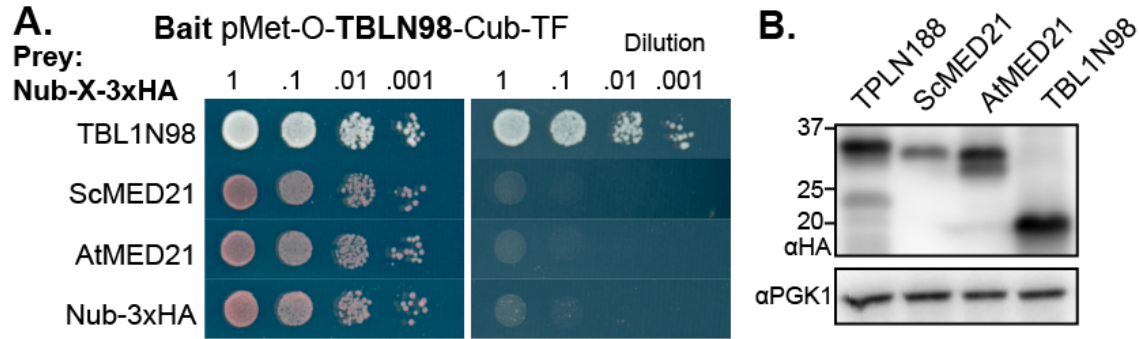

1310

1311

1312 **Figure 6 – Figure Supplement 4. A.** Identifying TBL1 N-terminal domain interactor

1313 proteins through cytoplasmic split ubiquitin protein interaction assay. TBL1N98 interacts

1314 with itself in yeast, but not with AtMED21 nor ScMED21. **B.** Protein abundance of

1315 TBL1N98 was tested by SDS-PAGE & western blot. Prey constructs are C-terminally

1316 fused to 2xHA. Total protein loading levels were tested by blotting against the

1317 housekeeping gene PGK1 (bottom panel).

1318

1319
